# Supplementary material for: A titanium tetrachloride-based effective methodology for the synthesis of dipeptides
Source: Royal Society of Chemistry journal article supplement (doi:10.1039/c9ra04058g), 2019-01-01

## Supporting Informations

### A titanium tetrachloride-based effective methodology for the synthesis of dipeptides

Alessandra Comandè, Marianna Greco, Emilia Lucia Belsito, Angelo Liguori, Antonella Leggio\*

Dipartimento di Farmacia e Scienze della Salute e della Nutrizione, Università della Calabria, Edificio Polifunzionale,  
I-87036 Arcavacata di Rende - Italy

\*Corresponding Author

Antonella Leggio E-mail: [antonella.leggio@unical.it](mailto:antonella.leggio@unical.it), tel: +39-0984 493199

#### Table of Contents:

|                                                                                                        |         |
|--------------------------------------------------------------------------------------------------------|---------|
| 1. Spectral data of compounds <b>1, 3-20</b>                                                           | S1-S6   |
| 2. Experimental details and spectral data of L-Asp-L-Phe-OMe ( <b>1a</b> )                             | S7      |
| 3. <sup>1</sup> H NMR, <sup>13</sup> C NMR and MS(EI) spectra of <i>N</i> -Boc-dipeptides <b>1-6</b>   | S8-S19  |
| 4. <sup>1</sup> H NMR, <sup>13</sup> C NMR spectra of L-Asp(OtBu)-Phe-OMe ( <b>1a</b> )                | S20     |
| 5. <sup>1</sup> H NMR, <sup>13</sup> C NMR spectra of <i>N</i> -Fmoc-dipeptides <b>7-17</b>            | S21-S31 |
| 6. <sup>1</sup> H NMR, <sup>13</sup> C NMR and MS(EI) spectra of <i>N</i> -Cbz-dipeptides <b>18-19</b> | S32-S35 |
| 7. <sup>1</sup> H NMR, <sup>13</sup> C NMR, MS(EI) spectra and GC/MS analysis of dipeptide <b>20</b>   | S36-S38 |
| 8. GC/MS analyses of dipeptides <b>3</b> and <b>4</b>                                                  | S39     |
| 9. <sup>1</sup> H NMR spectrum of a mixture of dipeptides <b>3</b> and <b>4</b>                        | S40     |
| 10. <sup>1</sup> H NMR spectrum of a mixture of dipeptides <b>9</b> and <b>10</b>                      | S41     |
| 11. GC/MS analyses of dipeptides <b>18</b> and <b>19</b>                                               | S42     |
| 12. <sup>1</sup> H NMR spectrum of a mixture of dipeptides <b>18</b> and <b>19</b>                     | S43     |

***N*-Boc-*L*-Asp(OtBu)-Phe-OMe (1)** Oil (0.133 g), 84 % yield; *R*<sub>f</sub> = 0.90; <sup>1</sup>H NMR (300 MHz, CDCl<sub>3</sub>) δ: 7.34 – 7.21 (m, 3H, ArH), 7.18 – 7.07 (m, 2H, ArH), 7.01 (d, *J* = 6.9 Hz, 1H, CONH), 5.66 (d, *J* = 8.2 Hz, 1H, OCONH), 4.80 (m, 1H, CHCOOCH<sub>3</sub>), 4.46 (m, 1H, CHCONH), 3.68 (s, 3H, OCH<sub>3</sub>), 3.12-3.07 (m, 2H, CH<sub>2</sub>Ph), 2.86 (dd, *J* = 16.9, 4.5 Hz, 1H, CH<sub>2</sub>COOtBu), 2.58 (dd, *J* = 16.9, 6.5 Hz, 1H, CH<sub>2</sub>COOtBu), 1.43 (s, 18H, (CH<sub>3</sub>)<sub>3</sub>C); <sup>13</sup>C NMR (75 MHz, CDCl<sub>3</sub>) δ: 173.59, 171.39, 170.61, 157.14, 135.82, 129.29, 128.53, 127.05, 81.64, 80.19, 53.51, 52.13, 50.68, 37.91, 37.28, 28.25, 28.00; GC/MS (EI, 70eV) *m/z* (% rel.): 281 (6), 276 (10), 262 (4), 207 (19), 162 (24), 131 (16), 91 (55), 86 (49), 71 (69), 57 (100). Found: C, 61.53; H, 7.63; N, 6.27. C<sub>23</sub>H<sub>34</sub>N<sub>2</sub>O<sub>7</sub> requires C, 61.32; H, 7.61; N, 6.22 %.

***N*-Boc-*L*-Ala-*L*-Ala-OMe (3)** White solid (0.167 g), 87 % yield; mp = 110-111 °C; *R*<sub>f</sub> = 0,70; <sup>1</sup>H NMR (300 MHz, CDCl<sub>3</sub>) δ: 6.94 (s<sub>broad</sub>, 1H, CONH), 5.28 (d, *J* = 6.7 Hz, 1H, OCONH), 4.53 (p, *J* = 7.2 Hz, 1H, CHCOOCH<sub>3</sub>), 4.18 (m, 1H, CHCONH), 3.71 (s, 3H, OCH<sub>3</sub>), 1.40 (s, 9H, (CH<sub>3</sub>)<sub>3</sub>C), 1.36 (d, *J* = 7.2 Hz, 3H, CH<sub>3</sub>CH); 1.33 (d, *J* = 7.1 Hz, 3H, CH<sub>3</sub>CH); <sup>13</sup>C NMR (75 MHz, CDCl<sub>3</sub>) δ: 173.14, 172.37, 155.44, 79.91, 52.32, 52.31, 47.96, 28.25, 18.30, 18.13; GC/MS (EI, 70eV) *m/z* (% rel.): 218 (2), 201 (23), 187 (6), 172 (3), 159 (5), 144 (60), 102 (40), 88 (48), 57 (100). Found: C, 52.68; H, 8.05; N, 10.16. C<sub>12</sub>H<sub>22</sub>N<sub>2</sub>O<sub>5</sub> requires C, 52.54; H, 8.08; N, 10.21 %.

***N*-Boc-*D*-Ala-*L*-Ala-OMe (4)** White solid (0.176 g), 87 % yield; mp = 67-68 °C; *R*<sub>f</sub> = 0.80; <sup>1</sup>H NMR (300 MHz, CDCl<sub>3</sub>) δ: 6.93 (s<sub>broad</sub>, 1H, CONH), 5.15 (d, *J* = 6.8 Hz, 1H, OCONH), 4.55 (p, *J* = 7.2 Hz, 1H, CHCOOCH<sub>3</sub>), 4.20 (m, 1H, CHCONH), 3.72 (s, 3H, OCH<sub>3</sub>), 1.51 – 1.27 (m, 15H, (CH<sub>3</sub>)<sub>3</sub>C, CH<sub>3</sub>CH); <sup>13</sup>C NMR (75 MHz, CDCl<sub>3</sub>) δ: 173.22, 172.27, 155.24, 80.19, 52.34, 52.33, 47.98, 28.27, 18.17, 18.16. GC/MS (EI, 70eV) *m/z* (% rel.): 218 (2), 201 (23), 187 (6), 172 (3), 159 (5), 144 (60), 102 (40), 88 (48), 57 (100). Found: C, 52.65; H, 8.03; N, 10.18. C<sub>12</sub>H<sub>22</sub>N<sub>2</sub>O<sub>5</sub> requires C, 52.54; H, 8.08; N, 10.21 %.

***N*-Boc-*L*-Ala-*L*-Cys(Bzl)-OMe (5)** Oil (0.250 g), 80 % yield; *R*<sub>f</sub> = 0.76; <sup>1</sup>H NMR (300 MHz, CDCl<sub>3</sub>) δ: 7.40 – 7.21 (m, 5H, ArH), 6.89 (d, *J* = 6.5 Hz, 1H, CONH), 5.06 (d, *J* = 7.1 Hz, 1H, OCONH), 4.77 (m, 1H, CHCOOCH<sub>3</sub>), 4.18 (m, 1H, CHCONH), 3.73 (s, 3H, OCH<sub>3</sub>), 3.70 (s, 2H, CH<sub>2</sub>Ph), 2.95-2.78 (m, 2H, CH<sub>2</sub>S), 1.44 (s, 9H, (CH<sub>3</sub>)<sub>3</sub>C), 1.36 (d, *J* = 7.1 Hz, 3H, CH<sub>3</sub>CH); <sup>13</sup>C NMR (75 MHz, CDCl<sub>3</sub>) δ: 172.56, 171.02, 155.45, 137.69, 128.96, 128.61, 127.27, 80.34, 52.67, 51.31, 49.81, 36.55, 32.84, 28.32, 18.12. GC/MS (EI, 70eV) *m/z* (% rel.): 322 (4), 296 (1), 281 (3), 231 (11), 208 (31), 175 (9), 124 (5), 101 (2), 91 (100), 73 (5). Found: C, 57.76; H, 7.09; N, 7.03; S, 8.06. C<sub>19</sub>H<sub>28</sub>N<sub>2</sub>O<sub>5</sub>S requires C, 57.55; H, 7.12; N, 7.07; S, 8.09 %.

***N*-Boc-L-Ala-L-Lys(Boc)-OMe (6)** Oil (0.176 g), 80 % yield; *R*<sub>f</sub> = 0.85; <sup>1</sup>H NMR (300 MHz, CDCl<sub>3</sub>) δ: 6.78 (d, *J* = 7.3 Hz, 1H, CONH), 5.15 (m, 1H, OCONH), 4.75 (m, 1H, CH<sub>2</sub>NHCOO), 4.58 (m, 1H, CHCOOCH<sub>3</sub>), 4.19 (m, 1H, CHCONH), 3.73 (s, 3H, OCH<sub>3</sub>), 3.15 – 3.02 (m, 2H, CH<sub>2</sub>NHCOO), 1.96 – 1.78 (m, 2H, CHCH<sub>2</sub>), 1.68 (m, 1H, CHCH<sub>2</sub>CH<sub>2</sub>), 1.56 – 1.39 (m, 21H, CHCH<sub>2</sub>CH<sub>2</sub>CH<sub>2</sub>, (CH<sub>3</sub>)<sub>3</sub>C), 1.36 (d, *J* = 7.1 Hz, 3H, CH<sub>3</sub>CH); <sup>13</sup>C NMR (75 MHz, CDCl<sub>3</sub>) δ: 172.71, 172.61, 156.17, 155.52, 80.00, 79.00, 52.38, 51.77, 49.81, 39.97, 31.88, 29.68, 29.19, 28.43, 28.29, 22.29, 17.93. GC/MS (EI, 70eV) *m/z* (% rel.): 331 (3), 321 (8), 258 (18), 187 (25), 158 (24), 145 (100), 128 (36), 84 (98), 73 (26), 57 (70). Found: C, 55.58; H, 8.62; N, 9.72. C<sub>20</sub>H<sub>37</sub>N<sub>3</sub>O<sub>7</sub> requires C, 55.67; H, 8.64; N, 9.74 %.

***N*-Fmoc-L-Asp(tBu)-L-Phe-OMe (7)** Oil (0.245 g), 84 % yield; *R*<sub>f</sub> = 0.80; <sup>1</sup>H NMR (300 MHz, CDCl<sub>3</sub>) δ: 7.78 (d, *J* = 7.4 Hz, 2H, ArH), 7.59 (d, *J* = 7.3 Hz, 2H, ArH), 7.42 (t, *J* = 7.4 Hz, 2H, ArH), 7.36-7.11 (m, 7H, ArH), 7.06 (d, *J* = 7.3 Hz, 1H, CONH), 5.97 (d, *J* = 8.0 Hz, 1H, OCONH), 4.83 (m, 1H, CHCOOCH<sub>3</sub>), 4.55 (m, 1H, CHCONH), 4.38 (m, 2H, CH<sub>2</sub>-Fmoc), 4.22 (m, 1H, CH-Fmoc), 3.70 (s, 3H, OCH<sub>3</sub>), 3.22-2.99 (m, 2H, CH<sub>2</sub>Ph), 2.90 (dd, *J* = 17.1, *J* = 4.1 Hz, 1H, CH<sub>2</sub>COOtBu), 2.62 (dd, *J* = 17.1, *J* = 6.6 Hz, 1H, CH<sub>2</sub>COOtBu), 1.45 (s, 9H, (CH<sub>3</sub>)<sub>3</sub>CH); <sup>13</sup>C NMR (75 MHz, CDCl<sub>3</sub>) δ: 171.38, 170.20, 170.14, 160.17, 143.73, 141.32, 135.75, 129.25, 128.59, 127.77, 127.11, 125.05, 120.01, 81.90, 67.18, 53.57, 52.18, 49.95, 47.13, 37.18, 31.57, 28.03. Found: C, 69.47; H, 6.36; N, 4.91. C<sub>33</sub>H<sub>36</sub>N<sub>2</sub>O<sub>7</sub> requires C, 69.21; H, 6.34; N, 4.89 %.

***N*-Fmoc-L-Ala-L-Ala-OMe (8)** White solid (0.285 g), 71 % yield; mp = 192-194 °C; *R*<sub>f</sub> = 0.54; <sup>1</sup>H NMR (300 MHz, CDCl<sub>3</sub>) δ: 7.68 (d, *J* = 7.5 Hz, 2H, ArH), 7.50 (d, *J* = 7.3 Hz, 2H, ArH), 7.31 (t, *J* = 7.5 Hz, 2H, ArH), 7.27 – 7.16 (m, 2H, ArH), 6.73 (d, *J* = 7.1 Hz, 1H, CONH), 5.55 (d, *J* = 7.5 Hz, 1H, OCONH), 4.50 (p, *J* = 7.1 Hz, 1H, CHCOOCH<sub>3</sub>), 4.37-4.17 (m, 3H, CH<sub>2</sub>-Fmoc, CHCONH), 4.13 (t, *J* = 7.0 Hz, 1H, CH-Fmoc), 3.65 (s, 1H, OCH<sub>3</sub>), 1.41-1.22 (m, 6H, CH<sub>3</sub>CH); <sup>13</sup>C NMR (75 MHz, CDCl<sub>3</sub>) δ: 173.13, 171.96, 156.11, 143.74, 141.31, 127.74, 127.09, 125.08, 120.00, 67.14, 52.48, 50.46, 48.12, 47.14, 18.87, 18.22. Found: C, 66.41; H, 6.07; N, 7.04. C<sub>22</sub>H<sub>24</sub>N<sub>2</sub>O<sub>5</sub> requires C, 66.65; H, 6.10; N, 7.07 %.

***N*-Fmoc-L-Leu-L-Ala-OMe (9)** White solid (0.256 g), 80 % yield; mp = 162-163 °C; *R*<sub>f</sub> = 0.65; <sup>1</sup>H NMR (300 MHz, CDCl<sub>3</sub>) δ: 7.81 – 7.71 (m, 2H, ArH), 7.64 – 7.52 (m, 2H, ArH), 7.45-7.35 (m, 2H, ArH), 7.34 – 7.22 (m, 2H, ArH), 6.91 (d, *J* = 7.2 Hz, 1H, CONH), 5.65 (d, *J* = 8.7 Hz, 1H, OCONH), 4.57 (p, *J* = 7.2 Hz, 1H, CHCOOCH<sub>3</sub>), 4.46 – 4.26 (m, 3H, CH<sub>2</sub>-Fmoc, CHCONH), 4.20 (m, 1H, CH-Fmoc), 3.72 (s, 3H, OCH<sub>3</sub>), 1.79 – 1.51 (m, 3H, CH<sub>2</sub>CH(CH<sub>3</sub>)<sub>2</sub>), 1.39 (d, *J* = 7.2 Hz, 3H, CH<sub>3</sub>CH),

1.02-0.83 (m, 6H, CH(CH<sub>3</sub>)<sub>2</sub>); <sup>13</sup>C NMR (75 MHz, CDCl<sub>3</sub>) δ: 173.11, 171.93, 156.17, 143.84, 141.31, 127.70, 127.07, 125.04, 119.97, 67.10, 53.44, 52.40, 48.07, 47.18, 41.65, 24.64, 22.88, 18.14. Found: C, 68.21; H, 6.85; N, 6.37. C<sub>25</sub>H<sub>30</sub>N<sub>2</sub>O<sub>5</sub> requires C, 68.47; H, 6.90; N, 6.39 %.

***N*-Fmoc-*D*-Leu-*L*-Ala-OMe (10)** White solid (0.326 g), 80 % yield; mp = 141-144 °C; R<sub>f</sub> = 0.66; <sup>1</sup>H NMR (300 MHz, CDCl<sub>3</sub>) δ: 7.79-7.72 (m, 2H, ArH), 7.65 – 7.53 (m, 2H, ArH), 7.44-7.35 (m, 2H, ArH), 7.34 – 7.25 (m, 2H, ArH), 6.78 (d, *J* = 7.1 Hz, 1H, CONH), 5.39 (d, *J* = 8.5 Hz, 1H, OCONH), 4.58 (p, *J* = 7.2 Hz, 1H, CHCOOCH<sub>3</sub>), 4.50 – 4.34 (m, 2H, CH<sub>2</sub>-Fmoc), 4.33-4.16 (m, 2H, CHCONH, CH-Fmoc), 3.71 (s, 3H, OCH<sub>3</sub>), 1.75 – 1.49 (m, 3H, CH<sub>2</sub>CH(CH<sub>3</sub>)<sub>2</sub>), 1.40 (d, *J* = 7.1 Hz, 3H, CH<sub>3</sub>CH), 0.99-0.85 (m, 6H, CH(CH<sub>3</sub>)<sub>2</sub>); <sup>13</sup>C NMR (75 MHz, CDCl<sub>3</sub>) δ: 173.11, 171.75, 158.44, 143.74, 141.32, 127.71, 127.06, 125.02, 119.98, 66.71, 53.37, 52.44, 48.07, 47.21, 41.47, 24.73, 22.94, 18.22. Found: C, 68.23; H, 6.84; N, 6.35. C<sub>25</sub>H<sub>30</sub>N<sub>2</sub>O<sub>5</sub> requires C, 68.47; H, 6.90; N, 6.39 %.

***N*-Fmoc-Gly-*L*-Ala-OMe (11)** Oil (0.191 g), 80 % yield; R<sub>f</sub> = 0.80; <sup>1</sup>H NMR (300 MHz, CDCl<sub>3</sub>) δ: 7.76 (d, *J* = 7.4 Hz, 2H, ArH), 7.60 (d, *J* = 7.3 Hz, 2H, ArH), 7.40 (t, *J* = 7.3 Hz, 2H, ArH), 7.35-7.28 (m, 2H, ArH), 6.78 (d, *J* = 6.1 Hz, 1H, CONH), 5.70 (s<sub>broad</sub>, 1H, OCONH), 4.59 (m, 1H, CHCOOCH<sub>3</sub>), 4.41 (d, *J* = 7.0 Hz, 2H, CH<sub>2</sub>-Fmoc), 4.22 (t, *J* = 7.0 Hz, 1H, CH-Fmoc), 3.88 (s<sub>broad</sub>, 2H, CH<sub>2</sub>CONH), 3.73 (s, 3H, OCH<sub>3</sub>), 1.41 (d, *J* = 7.1 Hz, 3H, CH<sub>3</sub>CH); <sup>13</sup>C NMR (75 MHz, CDCl<sub>3</sub>) δ: 173.27, 168.65, 155.64, 143.74, 141.30, 127.76, 127.10, 125.07, 120.02, 67.28, 52.59, 48.12, 47.07, 44.34, 18.24. Found: C, 66.22; H, 5.77; N, 7.29. C<sub>21</sub>H<sub>22</sub>N<sub>2</sub>O<sub>5</sub> requires C, 65.96; H, 5.80; N, 7.33 %.

***N*-Fmoc-*L*-Leu-*L*-Ile-OMe (12)** Oil (0.120 g), 87 % yield; R<sub>f</sub> = 0.80; <sup>1</sup>H NMR (300 MHz, CDCl<sub>3</sub>) δ: 7.77 (d, *J* = 7.5 Hz, 2H, ArH), 7.59 (d, *J* = 7.3 Hz, 2H, ArH), 7.40 (t, *J* = 7.4 Hz, 2H, ArH), 7.34 – 7.28 (m, 2H, ArH), 6.58 (d, *J* = 8.4 Hz, 1H, CONH), 5.36 (d, *J* = 8.4 Hz, 1H, OCONH), 4.58 (dd, *J* = 8.4, *J* = 4.9 Hz, 1H, CHCOOCH<sub>3</sub>), 4.47-4.35 (m, 2H, CH<sub>2</sub>-Fmoc), 4.31-4.17 (m, 2H, CH-Fmoc, CHCONH), 3.73 (s, 3H, OCH<sub>3</sub>), 1.98-1.74 (m, 2H, CH<sub>3</sub>CH, (CH<sub>3</sub>)<sub>2</sub>CH), 1.73-1.61 (m, 2H, (CH<sub>3</sub>)<sub>2</sub>CHCH<sub>2</sub>), 1.41 (m, 1H, CH<sub>3</sub>CH<sub>2</sub>), 1.15 (m, 1H, CH<sub>3</sub>CH<sub>2</sub>), 1.02 – 0.83 (m, 12H, (CH<sub>3</sub>)<sub>2</sub>CH, CH<sub>3</sub>CH, CH<sub>3</sub>CH<sub>2</sub>); <sup>13</sup>C NMR (75 MHz, CDCl<sub>3</sub>) δ: 172.05, 171.93, 156.16, 143.73, 141.31, 127.71, 127.06, 125.02, 119.97, 67.10, 56.46, 53.53, 52.02, 47.19, 41.32, 37.86, 25.14, 24.67, 22.86, 22.01, 15.40, 11.48. Found: C, 69.77; H, 7.51; N, 5.79. C<sub>28</sub>H<sub>36</sub>N<sub>2</sub>O<sub>5</sub> requires C, 69.98; H, 7.55; N, 5.83 %.

***N*-Fmoc-*L*-Ser(tBu)-*L*-Ala-OMe (13)** White solid (0.114 g), 76 % yield; mp = 86-87 °C; R<sub>f</sub> = 0.83; <sup>1</sup>H NMR (300 MHz, CDCl<sub>3</sub>) δ: 7.78 (d, *J* = 7.4 Hz, 2H, ArH), 7.65 – 7.58 (m, 2H, ArH), 7.51 (d, *J* =

6.9 Hz, 1H, CONH), 7.41 (t,  $J = 7.2$  Hz, 2H, ArH), 7.37 – 7.29 (m, 2H, ArH), 5.84 (d,  $J = 6.0$  Hz, 1H, OCONH), 4.60 (m, 1H,  $\underline{\text{CHCOOCH}_3}$ ), 4.40 (d,  $J = 7.1$  Hz, 2H,  $\text{CH}_2\text{-Fmoc}$ ), 4.32 – 4.19 (m, 2H,  $\text{CH-Fmoc}$ ,  $\underline{\text{CHCONH}}$ ), 3.83 (dd,  $J = 8.5$ ,  $J = 4.1$  Hz, 1H,  $\underline{\text{CH}_2\text{OtBu}}$ ), 3.77 (s, 3H, OCH<sub>3</sub>), 3.41 (t,  $J = 8.5$  Hz, 1H,  $\underline{\text{CH}_2\text{OtBu}}$ ), 1.44 (d,  $J = 7.2$  Hz, 3H,  $\underline{\text{CH}_3\text{CH}}$ ), 1.25 (s, 9H, (CH<sub>3</sub>)<sub>3</sub>C); <sup>13</sup>C NMR (75 MHz, CDCl<sub>3</sub>)  $\delta$ : 172.99, 170.04, 160.96, 143.90, 141.30, 127.71, 127.07, 125.14, 119.98, 80.89, 67.01, 61.87, 52.02, 50.66, 48.03, 47.16, 27.35, 18.15. Found: C, 66.88; H, 6.86; N, 5.95. C<sub>26</sub>H<sub>32</sub>N<sub>2</sub>O<sub>6</sub> requires C, 66.65; H, 6.88; N, 5.98 %.

***N-Fmoc-L-Ala-L-Cys(Bzl)-OMe (14)*** Oil (0.170 g), 78 % yield; R<sub>f</sub> = 0.76 ; <sup>1</sup>H NMR (300 MHz, CDCl<sub>3</sub>)  $\delta$ : 7.77 (d,  $J = 7.5$  Hz, 2H, ArH), 7.67-7.54 (m, 2H, ArH), 7.41 (t,  $J = 7.3$  Hz, 2H, ArH), 7.36 – 7.21 (m, 7H, ArH), 6.82 (s<sub>broad</sub>, 1H, CONH), 5.50 (s<sub>broad</sub>, 1H, OCONH), 4.78 (m, 1H,  $\underline{\text{CHCOOCH}_3}$ ), 4.40 (d,  $J = 7.0$  Hz, 2H,  $\text{CH}_2\text{-Fmoc}$ ), 4.31 (m, 1H,  $\underline{\text{CHCONH}}$ ), 4.22 (t,  $J = 7.0$  Hz, 1H,  $\text{CH-Fmoc}$ ), 3.73 (s, 3H, OCH<sub>3</sub>), 3.66 (s, 2H, CH<sub>2</sub>Ph), 2.89 (d,  $J = 4.9$  Hz, 2H,  $\text{CHCH}_2\text{S}$ ), 1.40 (d,  $J = 6.8$  Hz, 3H,  $\underline{\text{CH}_3\text{CH}}$ ); <sup>13</sup>C NMR (75 MHz, CDCl<sub>3</sub>)  $\delta$ : 172.15, 170.89, 156.01, 143.99, 141.31, 137.67, 128.90, 128.62, 127.72, 127.30, 127.09, 125.08, 119.98, 67.00, 52.64, 51.81, 50.40, 47.16, 36.65, 33.34, 18.57. Found: C, 66.98; H, 5.80; N, 5.36; S, 6.16. C<sub>29</sub>H<sub>30</sub>N<sub>2</sub>O<sub>5</sub>S requires C, 67.16; H, 5.83; N, 5.4; S, 6.18%.

***N-Fmoc-L-Ala-L-Lys(Boc)-OMe (15)*** Yellow solid (0.227 g), 74 % yield; mp = 140-143 °C; R<sub>f</sub> = 0.66; <sup>1</sup>H NMR (300 MHz, CDCl<sub>3</sub>)  $\delta$  7.81-7.71 (m, 2H, ArH), 7.65-7.52 (m, 2H, ArH), 7.40 (t,  $J = 7.0$  Hz, 2H, ArH), 7.35-7.27 (m, 2H, ArH), 6.86 (d,  $J = 7.6$  Hz, 1H, CONH), 5.73 (d,  $J = 7.3$  Hz, 1H, OCONH), 5.29 (s, 1H,  $\underline{\text{NHCH}_2}$ ), 4.77 (m, 1H,  $\underline{\text{CHCOOCH}_3}$ ), 4.57 (m, 1H,  $\underline{\text{CHCONH}}$ ), 4.37 (d,  $J = 7.1$  Hz, 2H,  $\text{CH}_2\text{-Fmoc}$ ), 4.21 (t,  $J = 7.1$  Hz, 1H,  $\text{CH-Fmoc}$ ), 3.73 (s, 3H, OCH<sub>3</sub>), 3.18-2.95 (m, 2H,  $\underline{\text{NHCH}_2\text{CH}_2}$ ), 1.83 (m, 1H,  $\underline{\text{CHCH}_2}$ ), 1.66 (m, 1H,  $\underline{\text{CHCH}_2}$ ), 1.49 – 1.19 (m, 16H,  $\underline{\text{CH}_3\text{CH}}$ , (CH<sub>3</sub>)<sub>3</sub>C,  $\underline{\text{CH}_2\text{CH}_2\text{CH}_2}$  CH<sub>2</sub>); <sup>13</sup>C NMR (75 MHz, CDCl<sub>3</sub>)  $\delta$  172.56, 172.36, 161.52, 157.67, 143.69, 141.28, 127.73, 127.10, 125.10, 119.98, 79.28, 67.22, 56.70, 52.24, 50.46, 47.05, 41.54, 29.37, 28.42, 22.22, 16.03. Found: C, 64.87; H, 7.06; N, 7.55. C<sub>30</sub>H<sub>39</sub>N<sub>3</sub>O<sub>7</sub> requires C, 65.08; H, 7.10; N, 7.59 %.

***N-Fmoc-L-Cys(Bzl)-L-Ala-OMe (16)*** Yellow solid (0.296 g), 78 % yield; mp = 155-157 °C; R<sub>f</sub> = 0.86; <sup>1</sup>H NMR (300 MHz, CDCl<sub>3</sub>) two diastereoisomers (90\*:10)  $\delta$  7.80 (d,  $J = 7.5$  Hz, 2H, ArH), 7.63 (d,  $J = 7.3$  Hz, 2H, ArH), 7.44 (t,  $J = 7.4$  Hz, 2H, ArH), 7.40-7.20 (m, 7H, ArH), 6.89\* and 6.81 (2s<sub>broad</sub>, 1H, CONH), 5.72 (s<sub>broad</sub>, 1H, OCONH), 4.59 (p,  $J = 7.2$  Hz, 1H,  $\underline{\text{CHCOOCH}_3}$ ), 4.53 – 4.39 (m, 2H,  $\text{CH}_2\text{-Fmoc}$ ), 4.39-4.15 (m 2H,  $\underline{\text{CHCONH}}$ ,  $\text{CH-Fmoc}$ ), 3.92-3.63 (m, 5H,  $\text{SCH}_2\text{Ph}$ , OCH<sub>3</sub>), 2.92 (dd,  $J = 13.5$  Hz,  $J = 5.4$  Hz, 1H,  $\underline{\text{CHCH}_2\text{S}}$ ), 2.79 (dd,  $J = 13.5$  Hz,  $J = 6.9$  Hz, 1H,  $\underline{\text{CHCH}_2\text{S}}$ ),

1.44 (d,  $J = 7.1$  Hz, 3H);  $^{13}\text{C}$  NMR (75 MHz,  $\text{CDCl}_3$ )  $\delta$  172.96, 169.88, 156.01, 143.72, 141.32, 137.94, 129.78, 128.78, 128.19, 126.26, 124.06, 121.09, 119.03, 67.09, 54.90, 51.67, 49.07, 47.90, 36.56, 34.23, 17.28. Found: C, 66.89; H, 5.81; N, 5.35; S, 6.17.  $\text{C}_{29}\text{H}_{30}\text{N}_2\text{O}_5\text{S}$  requires C, 67.16; H, 5.83; N, 5.4; S, 6.18%.

***N*-Fmoc-*D*-Cys(*Bzl*)-*L*-Ala-*OMe* (17)** Yellow solid (0.310 g), 74 % yield; mp = 147-148 °C; Rf = 0.86;  $^1\text{H}$  NMR (300 MHz,  $\text{CDCl}_3$ ) two diastereoisomers (90\*:10)  $\delta$  7.80 (d,  $J = 7.5$  Hz, 2H, ArH), 7.63 (d,  $J = 7.3$  Hz, 2H, ArH), 7.44 (t,  $J = 7.4$  Hz, 2H, ArH), 7.40-7.23 (m, 7H, ArH), 6.91 and 6.82\* (2  $S_{\text{broad}}$ , 1H, CONH), 5.73 ( $S_{\text{broad}}$ , 1H, OCONH), 4.61 (p,  $J = 7.1$  Hz, 1H,  $\text{CHCOOCH}_3$ ), 4.53 – 4.30 (m, 3H,  $\text{CH}_2$ -Fmoc,  $\text{CHCONH}$ ), 4.26 (t,  $J = 7.0$  Hz, 1H, CH-Fmoc), 3.89-3.61 (m, 5H,  $\text{SCH}_2\text{Ph}$ ,  $\text{OCH}_3$ ), 2.92 (dd,  $J = 13.4$  Hz,  $J = 4.7$  Hz, 1H,  $\text{CHCH}_2\text{S}$ ), 2.81 (dd,  $J = 13.4$  Hz,  $J = 7.1$  Hz, 1H,  $\text{CHCH}_2\text{S}$ ), 1.44 (d,  $J = 7.1$  Hz, 3H);  $^{13}\text{C}$  NMR (75 MHz,  $\text{CDCl}_3$ )  $\delta$  172.96, 169.77, 156.03, 143.68, 141.30, 137.89, 129.76, 128.68, 128.18, 126.28, 124.05, 121.07, 119.03, 67.19, 54.91, 51.66, 49.06, 47.95, 36.52, 34.33, 17.26. Found: C, 66.87; H, 5.78; N, 5.38; S, 6.16.  $\text{C}_{29}\text{H}_{30}\text{N}_2\text{O}_5\text{S}$  requires C, 67.16; H, 5.83; N, 5.4; S, 6.18%.

***N*-Cbz-*L*-Ala-*L*-Ala-*OMe* (18)** White solid (0.243 g), 74 % yield; mp = 104-106 °C; Rf = 0.84;  $^1\text{H}$  NMR (300 MHz,  $\text{CDCl}_3$ )  $\delta$ : 7.40 – 7.20 (m, 5H, ArH), 6.78 (d,  $J = 7.2$  Hz, 1H, CONH), 5.54 (d,  $J = 7.5$  Hz, 1H, OCONH), 5.10 (s, 2H,  $\text{CH}_2\text{Ph}$ ), 4.55 (p, 1H,  $J = 7.2$  Hz,  $\text{CHCOOCH}_3$ ), 4.30 (m, 1H, 173.12, 171.86, 155.67, 136.26, 128.50, 128.14, 128.00, 66.99, 52.39, 50.36, 48.07, 18.61, 18.17. GC/MS (EI, 70eV)  $m/z$  (% rel.): 308 [ $\text{M}^+$ ] (2), 249 (2), 206 (3), 178 (9), 134 (16), 102 (9), 91 (100), 88 (13), 70 (6), 59 (2). Found: C, 58.51; H, 6.53; N, 9.07.  $\text{C}_{15}\text{H}_{20}\text{N}_2\text{O}_5$  requires C, 58.43; H, 6.54; N, 9.09 %.

***N*-Cbz-*D*-Ala-*L*-Ala-*OMe* (19)** White solid (0.197 g), 75 % yield; mp = 136-137 °C; Rf = 0.85;  $^1\text{H}$  NMR (300 MHz,  $\text{CDCl}_3$ )  $\delta$ : 7.44 – 7.18 (m, 5H, ArH), 7.01 (d,  $J = 7.1$  Hz, 1H, CONH), 5.71 (d,  $J = 7.6$  Hz, 1H, OCONH), 5.09 (s, 2H,  $\text{CH}_2\text{Ph}$ ), 4.55 (p,  $J = 7.1$  Hz, 1H,  $\text{CHCOOCH}_3$ ), 4.33 (m, 1H,  $\text{CHCONH}$ ), 3.70 (s, 3H,  $\text{OCH}_3$ ), 1.37 (d,  $J = 7.0$  Hz, 6H,  $\text{CH}_3\text{CH}$ );  $^{13}\text{C}$  NMR (75 MHz,  $\text{CDCl}_3$ )  $\delta$ : 173.35, 172.01, 155.96, 136.19, 128.54, 128.20, 128.06, 67.01, 52.52, 50.74, 48.01, 18.66, 18.08. GC/MS (EI, 70eV)  $m/z$  (% rel.): 308 [ $\text{M}^+$ ] (2), 249 (2), 206 (3), 178 (9), 134 (16), 102 (9), 91 (100), 88 (13), 70 (6), 59 (2). Found: C, 58.53; H, 6.51; N, 9.07.  $\text{C}_{15}\text{H}_{20}\text{N}_2\text{O}_5$  requires C, 58.43; H, 6.54; N, 9.09 %.

***N-Ns-L-Phe-L-Ala-OMe (20)*** Yellow solid (0.169 g), 48 % yield; mp = 168-172 °C; Rf = 0.85; <sup>1</sup>H NMR (300 MHz, CDCl<sub>3</sub>), two diastereoisomers (74\*:26) δ: 8.14 (d, *J* = 8.2 Hz, 2H, ArH), 7.77 (d, *J* = 8.2 Hz, 2H, ArH), 7.20-7.07 (m, 3H, ArH), 7.07-6.94 (m, 3H, ArH), 6.89\* and 6.66 (2d, *J* = 6.8 Hz, 1H, ArSO<sub>2</sub>NH), 6.19 (d, *J* = 7.6 Hz, 1H, CONH), 4.44 (m, 1H, CHCOOCH<sub>3</sub>), 4.03 (m, 1H, CHCONH), 3.73\* and 3.72 (2s, 3H, OCH<sub>3</sub>), 3.09 (dd, *J* = 13.5, *J* = 4.5 Hz, 1H, CH<sub>2</sub>Ph), 2.91 (dd, *J* = 13.5, 8.8 Hz, 1H, CH<sub>2</sub>Ph), 1.32\* and 1.26 (2d, *J* = 7.0 Hz, 3H, CH<sub>3</sub>CH); <sup>13</sup>C NMR (75 MHz, CDCl<sub>3</sub>) two diastereoisomers (74\*:26) δ: 172.64, 169.65, 149.93, 145.21, 135.45, 129.27, 128.78, 128.19, 127.28, 124.17, 58.48, 53.30 and 52.36\*, 48.41, 38.92, 19.29 and 18.01\*. GC/MS (EI, 70eV) m/z (% rel.): 376 (7), 344 (8), 305 (100), 233 (43), 186 (23), 174 (63), 156 (10), 130 (32), 122 (36), 118 (45), 91 (63), 76 (14), 59 (9). Found: C, 52.32; H, 4.87; N, 9.67; S, 7.35. C<sub>19</sub>H<sub>21</sub>N<sub>3</sub>O<sub>7</sub>S requires C, 52.41; H, 4.86; N, 9.65; S, 7.36%.

### Synthesis of L-Asp-L-Phe-OMe (1a)

To a solution of *N*-Boc-Asp-(OtBu)-Phe-OMe (**1**) (0.1 g, 0.22 mmol), in dry CH<sub>2</sub>Cl<sub>2</sub> (1,5 mL), trifluoroacetic acid (TFA) (1,5 mL) was added and stirred for 2 h at room temperature. The progress of the reaction was followed by TLC analysis with chloroform–methanol 80 : 20, (v/v) as eluent and visualization with 0.2% ninhydrin in ethanol. Then excess reagent and solvent were removed under vacuum. The resulting oil was stirred in cold diethyl ether (15 mL) and L-Asp-L-Phe-OMe (**1a**) was recovered by filtration as a white solid (0.086 g) in 95 % yield.

mp = 244-245 °C; *R*<sub>f</sub> = 0.20; <sup>1</sup>H NMR (300 MHz, DMSO-*d*<sub>6</sub>) δ: 8.86 (d, *J* = 6.9 Hz, 1H, CONH), 7.39 – 7.09 (m, 5H, ArH), 4.52 (m, 1H, CHCOOCH<sub>3</sub>), 4.01 (m, 1H, CHCONH), 3.61 (s, 3H, OCH<sub>3</sub>), 3.07 (dd, *J* = 13.9, 5.3 Hz, 1H, CH<sub>2</sub>Ph), 2.93 (dd, *J* = 13.9, 9.1 Hz, 1H, CH<sub>2</sub>Ph), 2.78 (dd, *J* = 17.5, 3.4 Hz, 1H, CH<sub>2</sub>COOH), 2.65 (dd, *J* = 17.5, 8.4 Hz, 1H, CH<sub>2</sub>COOH); <sup>13</sup>C NMR (75 MHz, DMSO-*d*<sub>6</sub>) δ: 171.74, 171.50, 168.84, 137.28, 129.50, 128.82, 127.17, 54.52, 52.50, 50.63, 38.14, 36.82. Found: C, 56.98; H, 6.14; N, 9.49. C<sub>14</sub>H<sub>18</sub>N<sub>2</sub>O<sub>5</sub> requires C, 57.13; H, 6.16; N, 9.52 %.



***N*-Boc-L-Asp(OtBu)-Phe-OMe (1)**

**<sup>1</sup>H NMR**

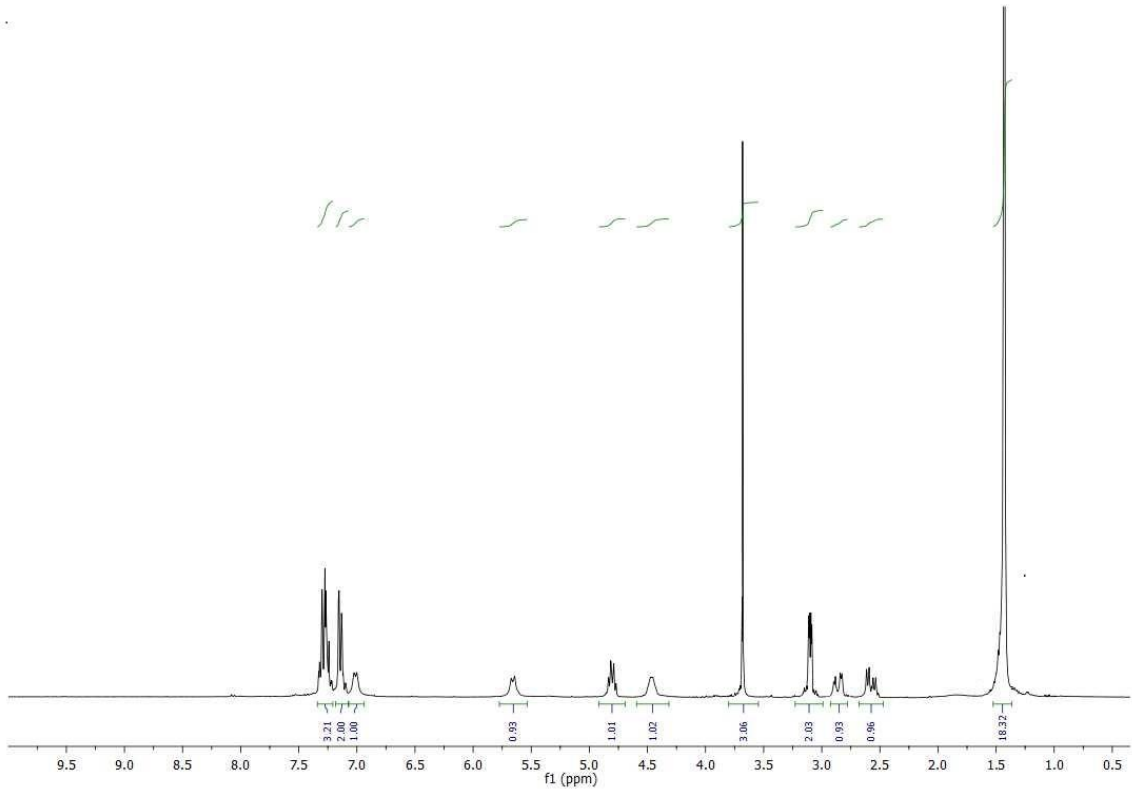

**<sup>13</sup>C NMR**

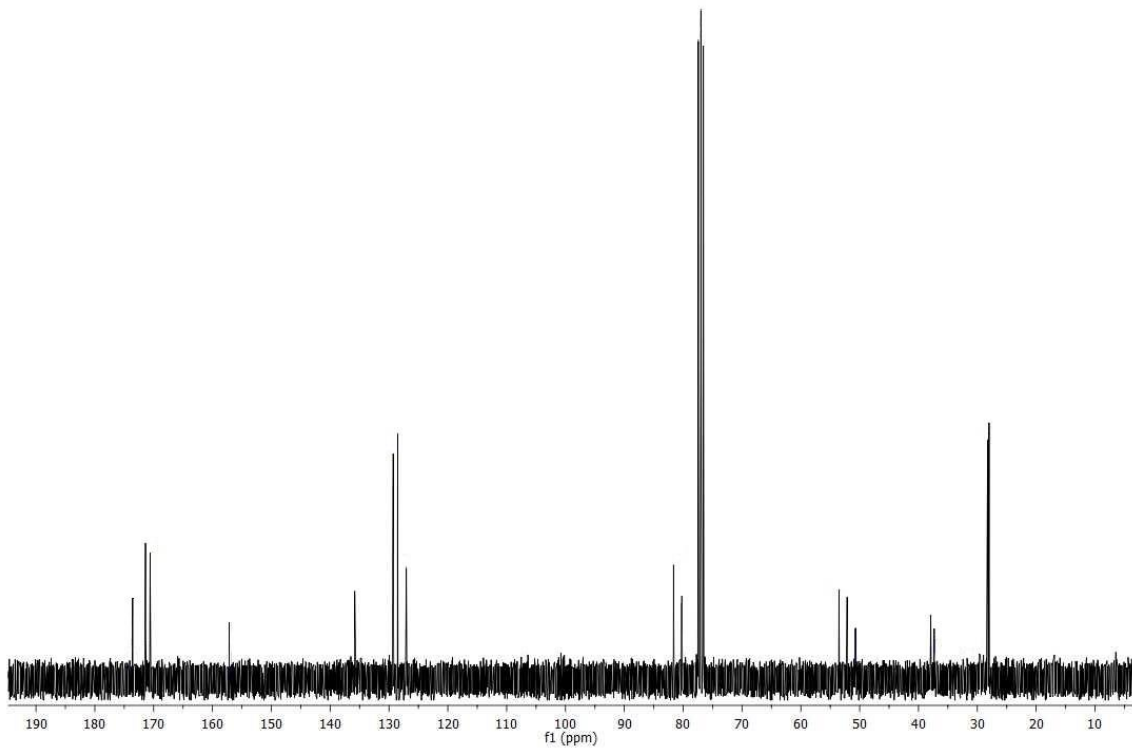

# MS (EI)

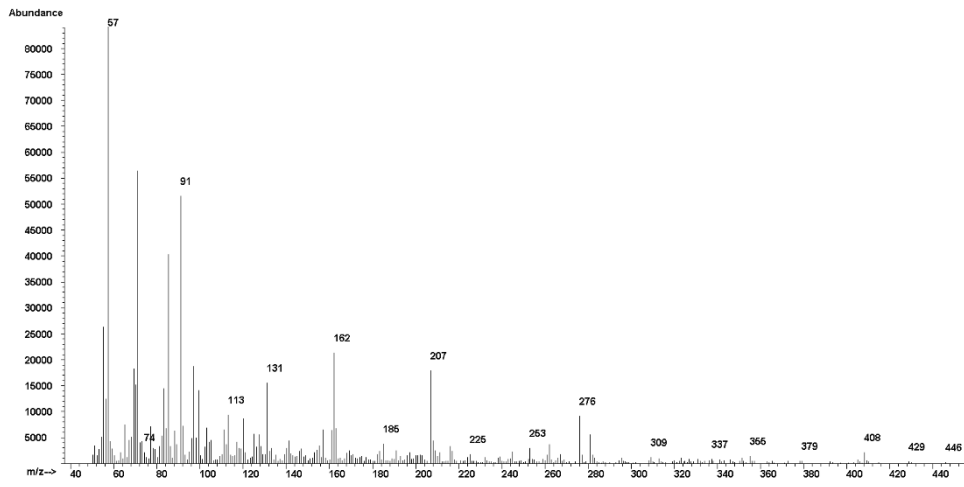

***N*-Boc-L-Phe-L-Ala-OMe (2)**

**<sup>1</sup>H NMR**

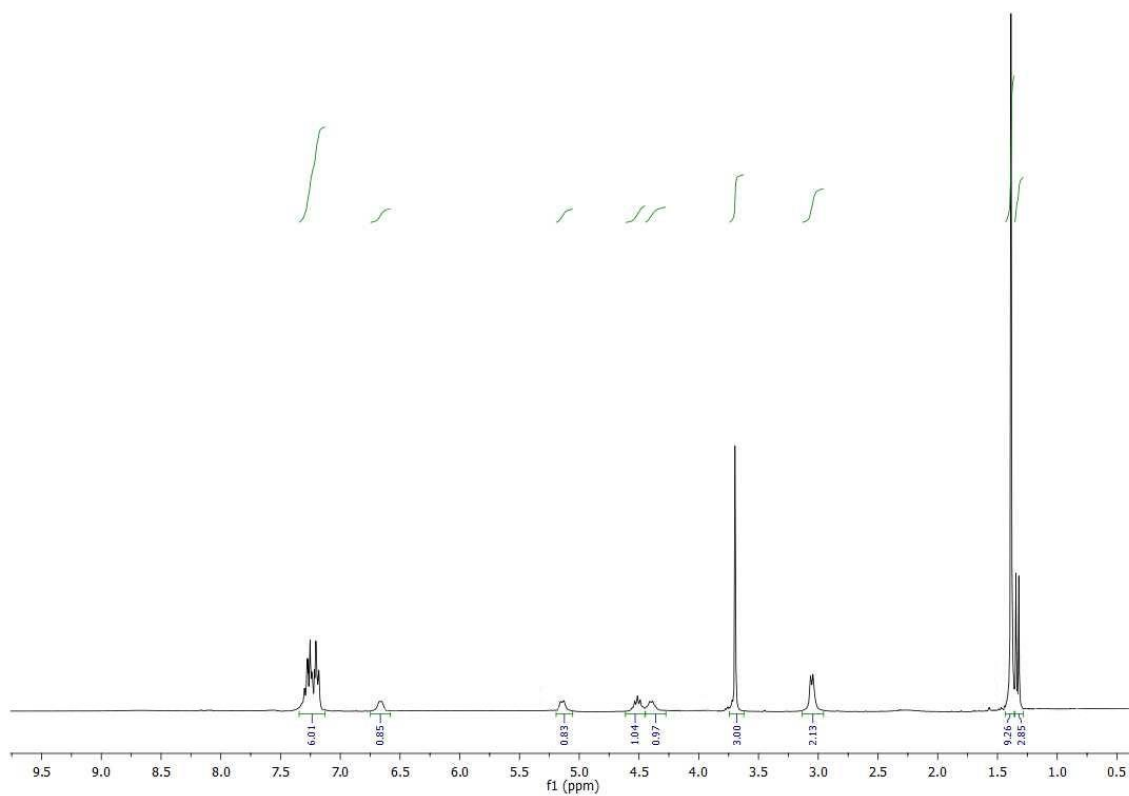

**<sup>13</sup>C NMR**

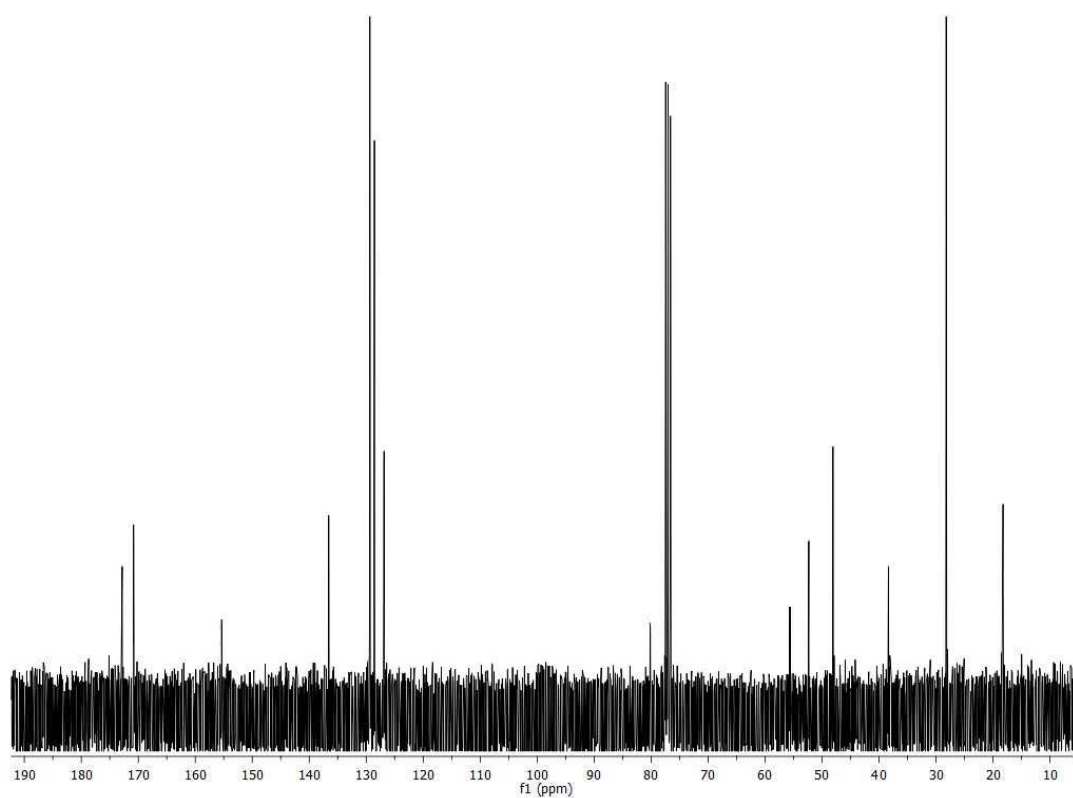

# MS (EI)

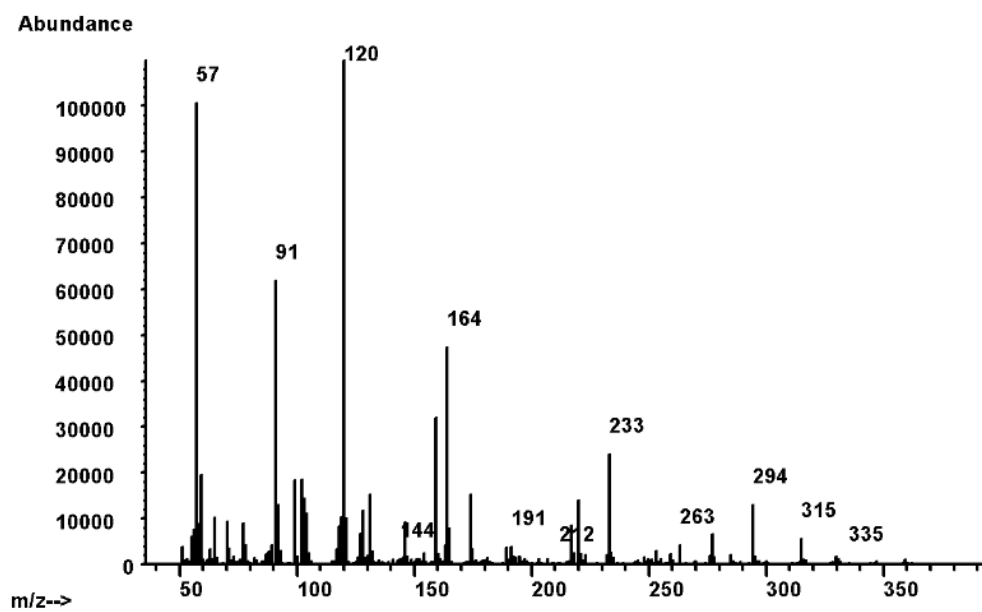

***N*-Boc-L-Ala-L-Ala-OMe (3)**

**<sup>1</sup>H NMR**

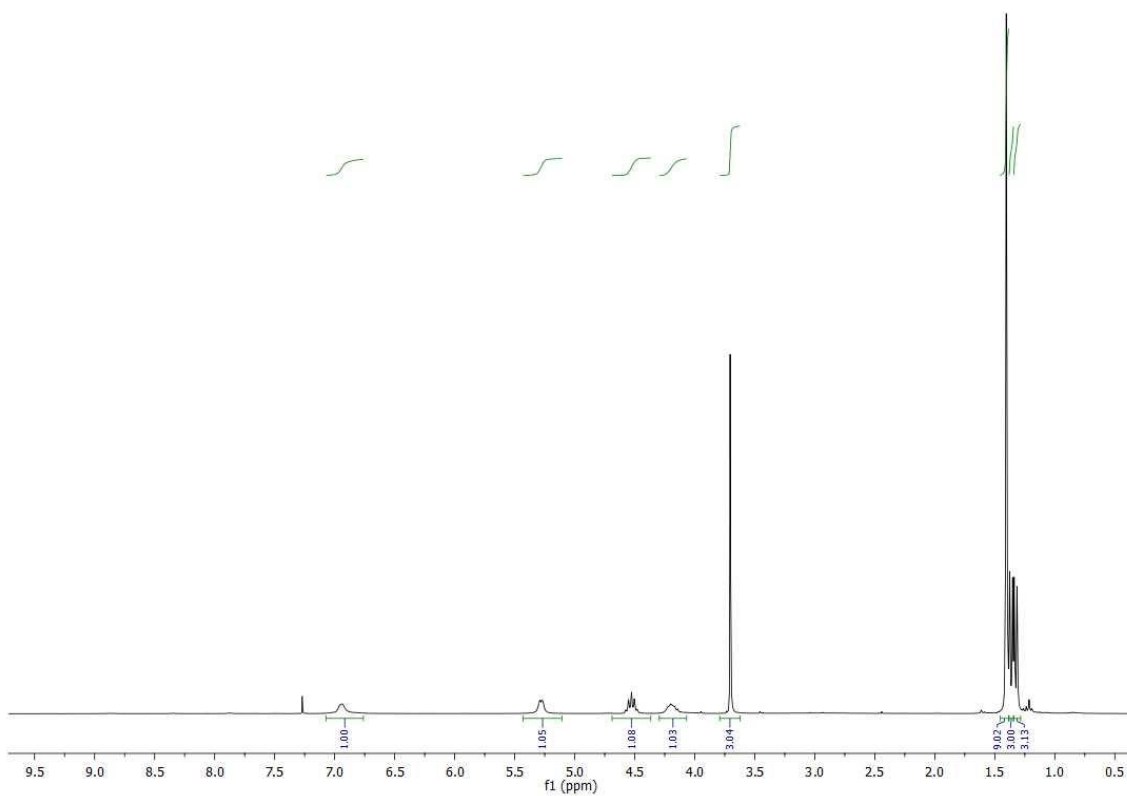

**<sup>13</sup>C NMR**

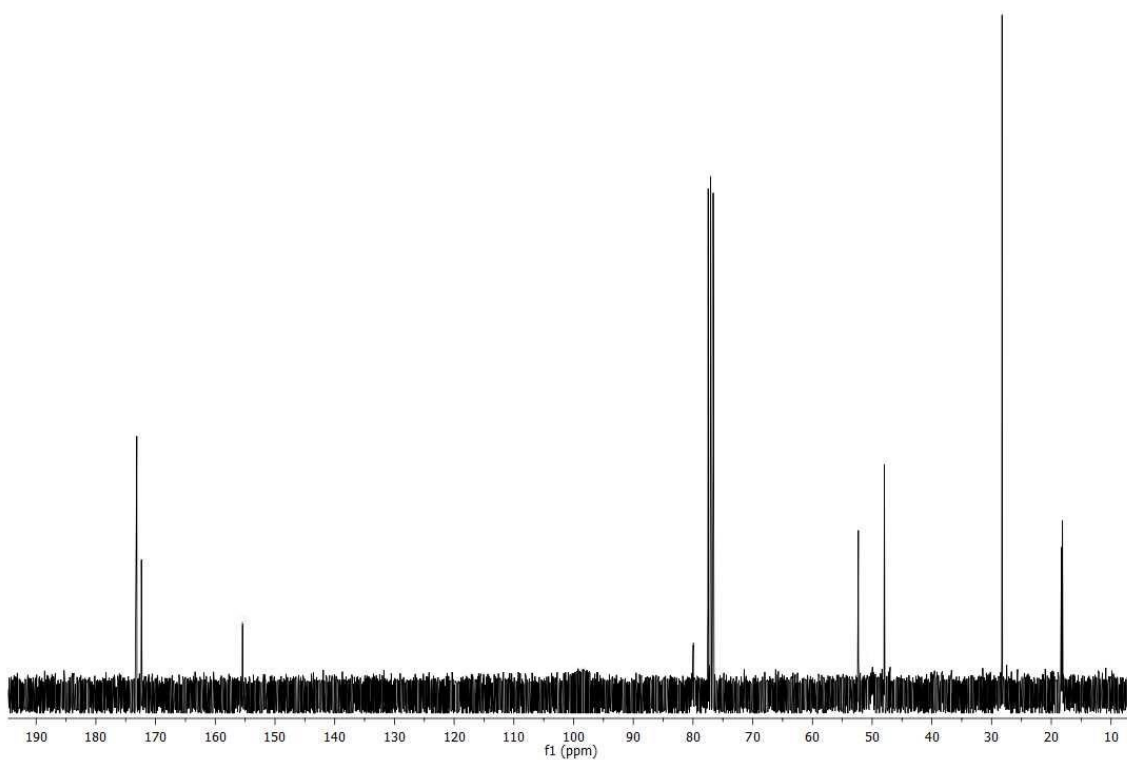

# MS (EI)

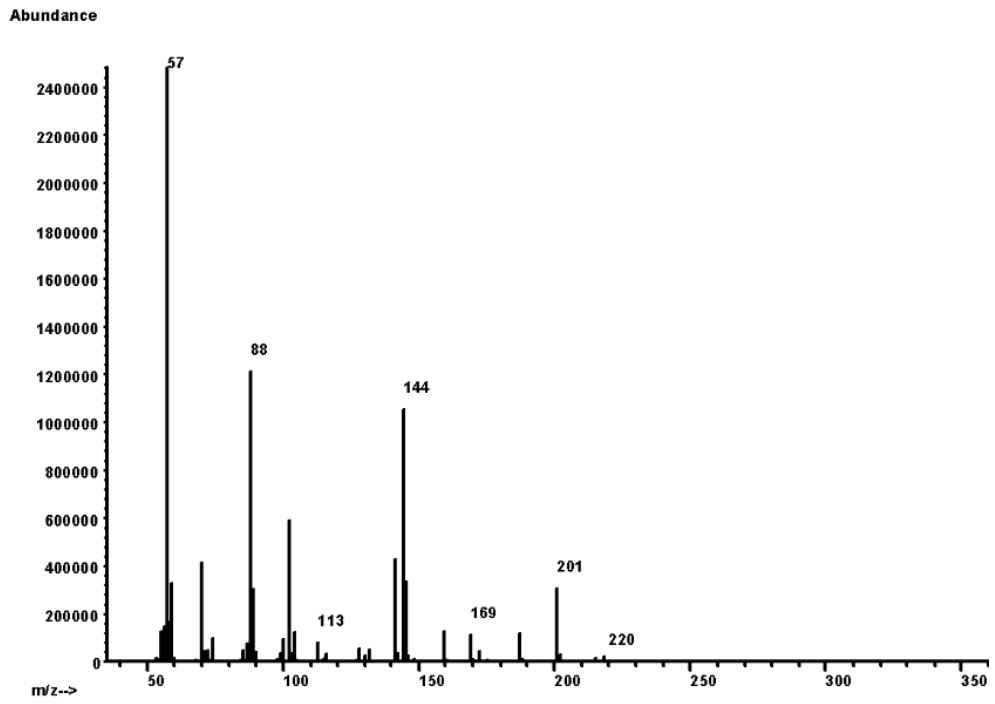

***N*-Boc-D-Ala-L-Ala-OMe (4)**

**<sup>1</sup>H NMR**

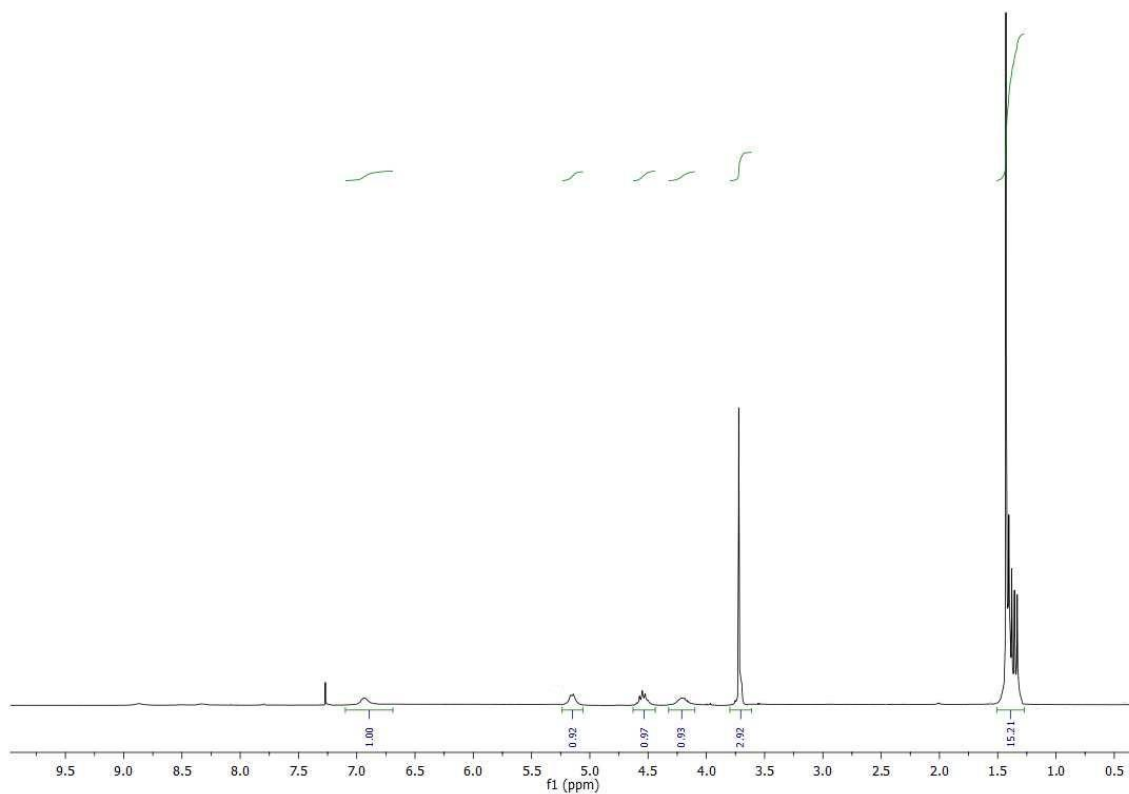

**<sup>13</sup>C NMR**

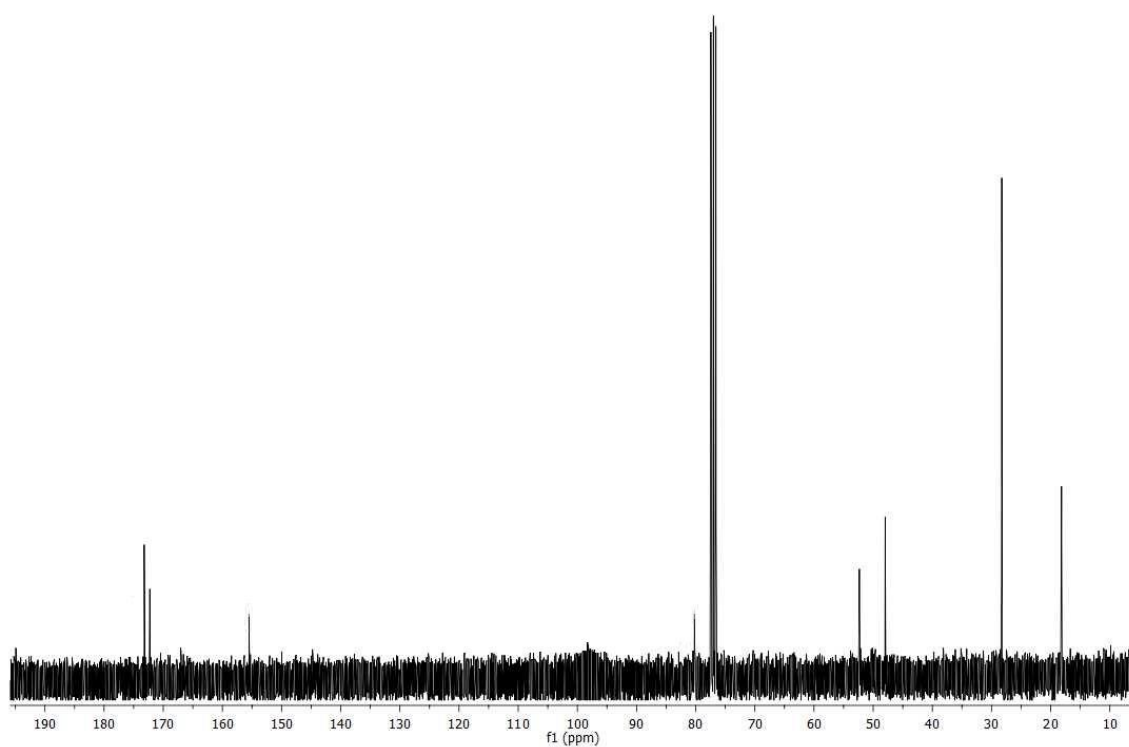

# MS (EI)

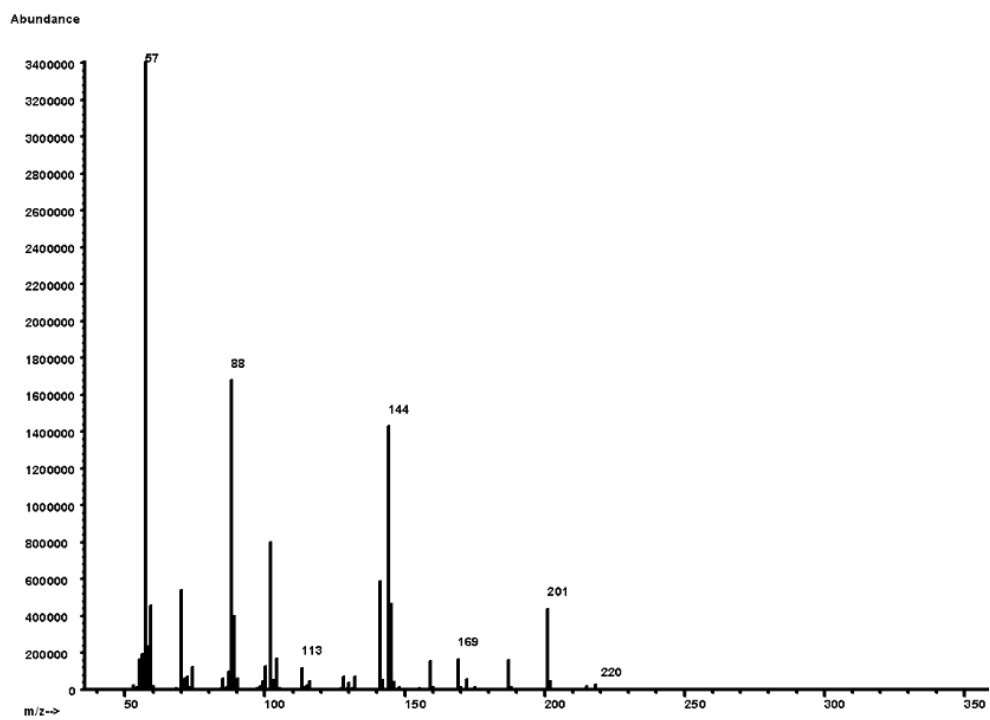



***N*-Boc-L-Ala-L-Cys(Bzl)-OMe (5)**

**<sup>1</sup>H NMR**

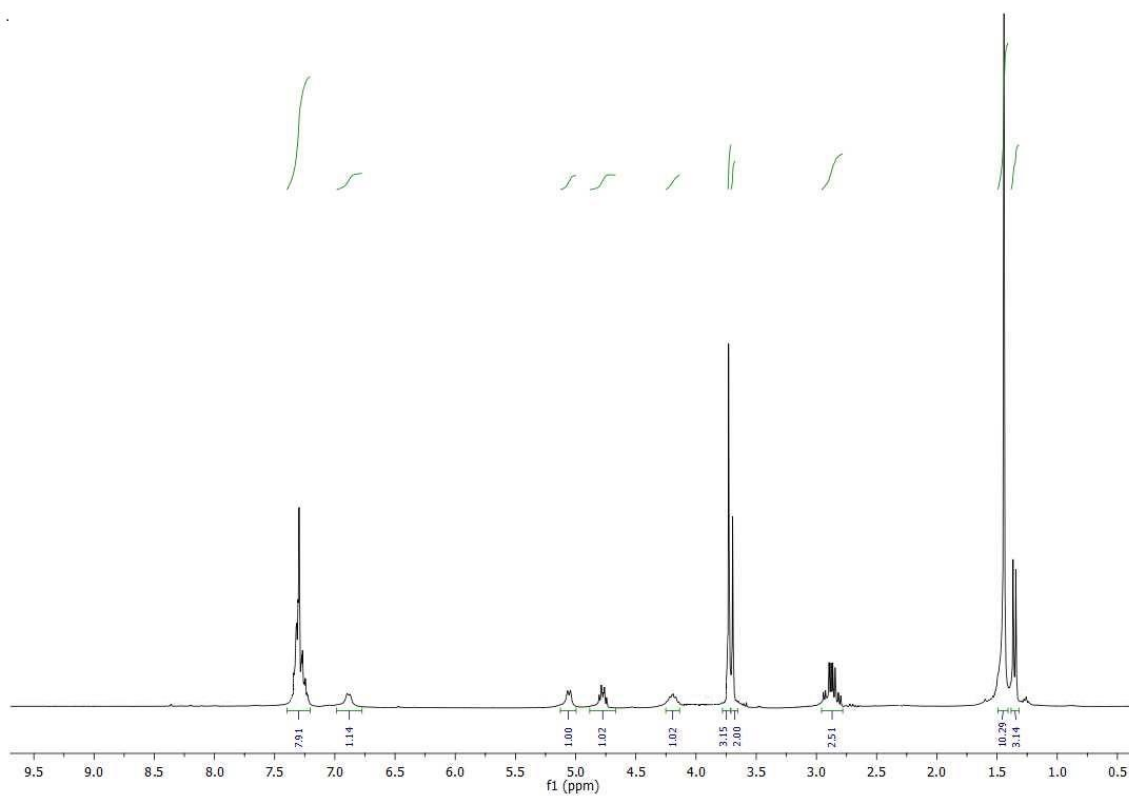

**<sup>13</sup>C NMR**

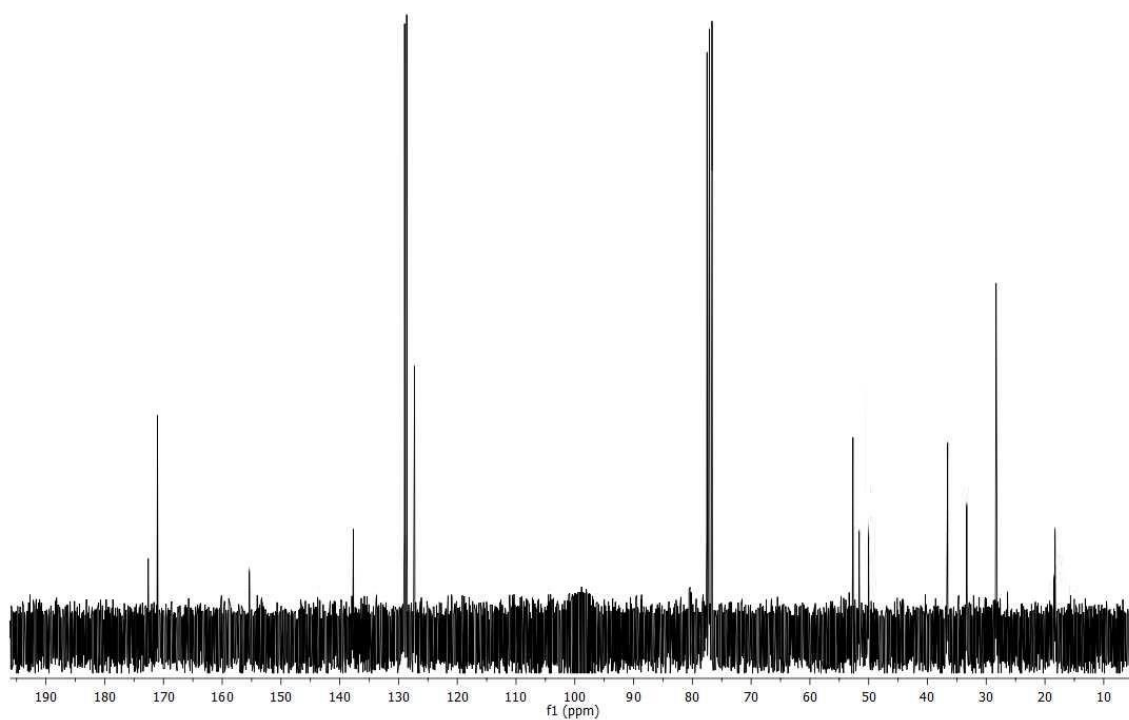

# MS (EI)

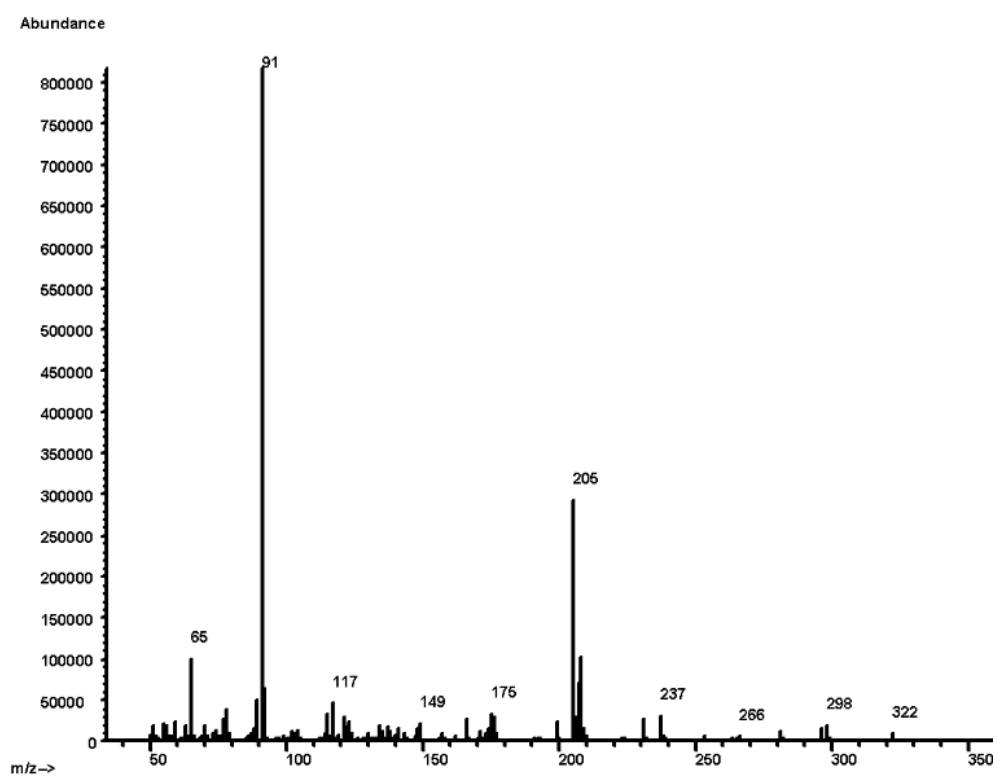

***N*-Boc-L-Ala-L-Lys(Boc)-OMe (6)**

**<sup>1</sup>H NMR**

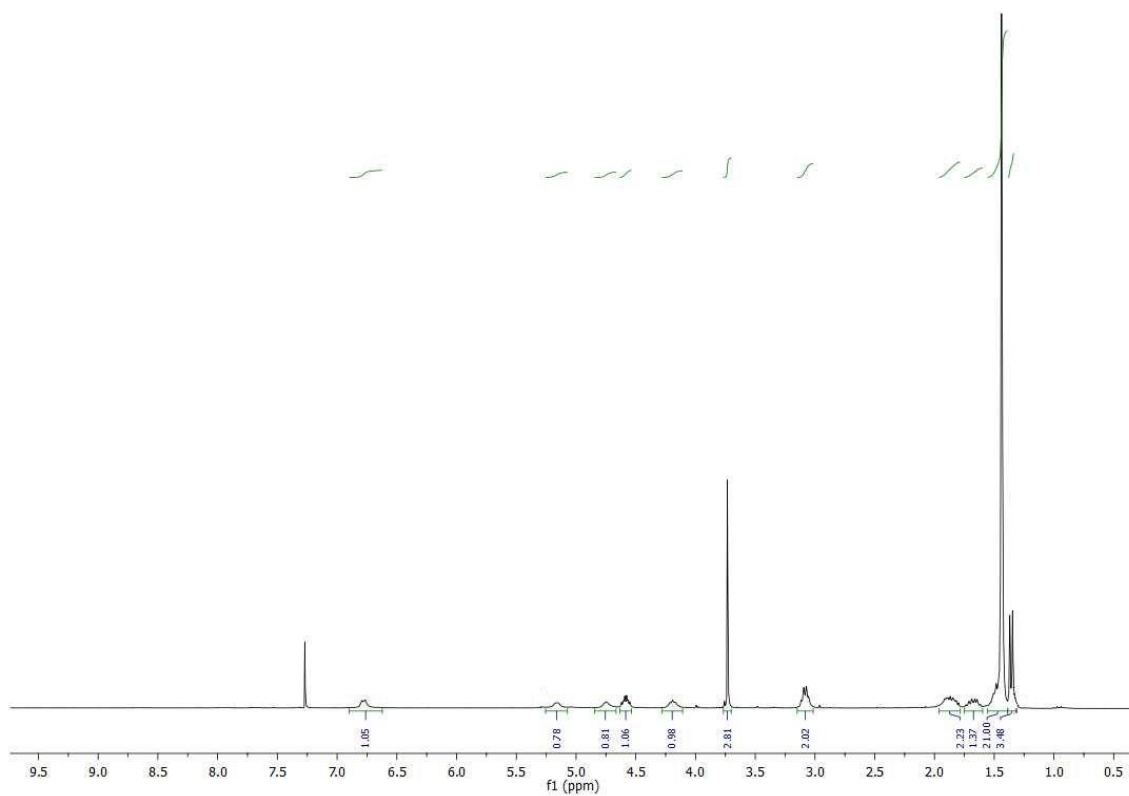

**<sup>13</sup>C NMR**

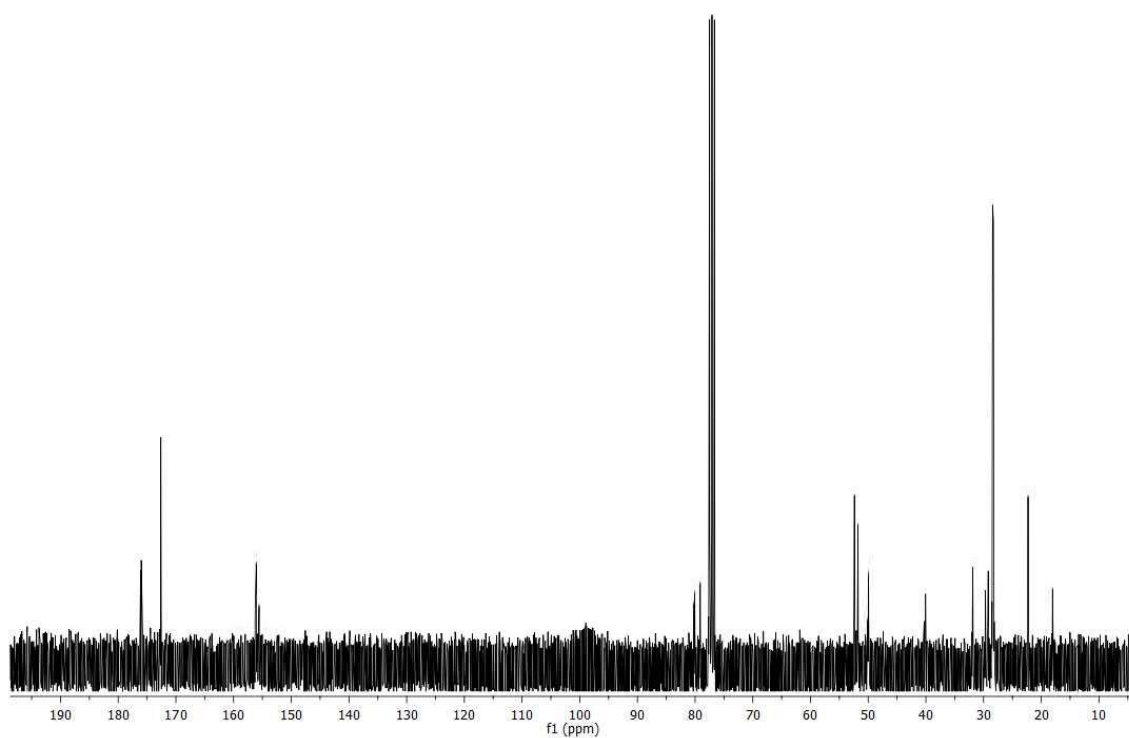

# MS (EI)

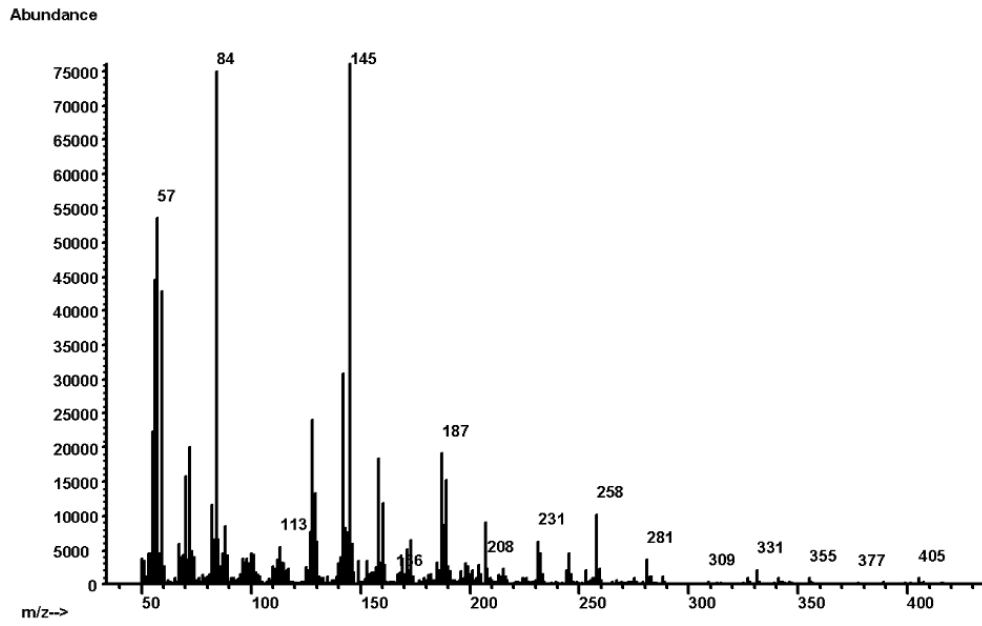

# L-Asp-Phe-OMe (1a)

## $^1\text{H}$ NMR

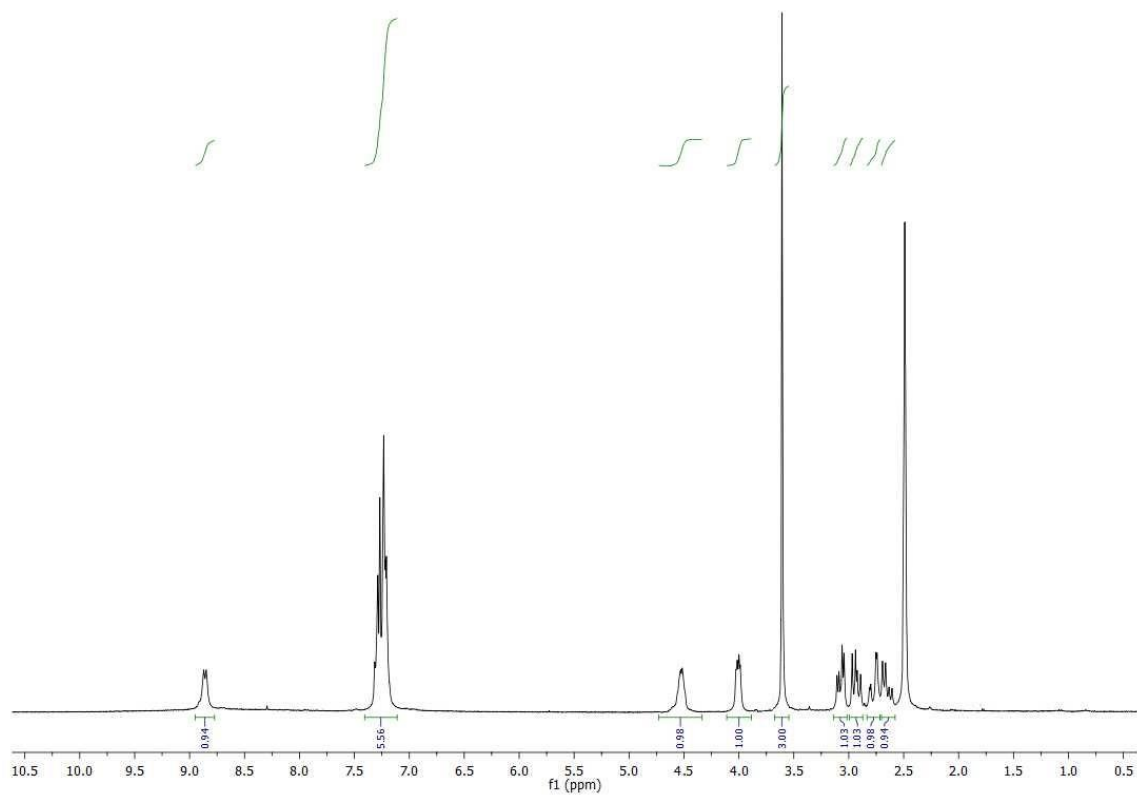

## $^{13}\text{C}$ NMR

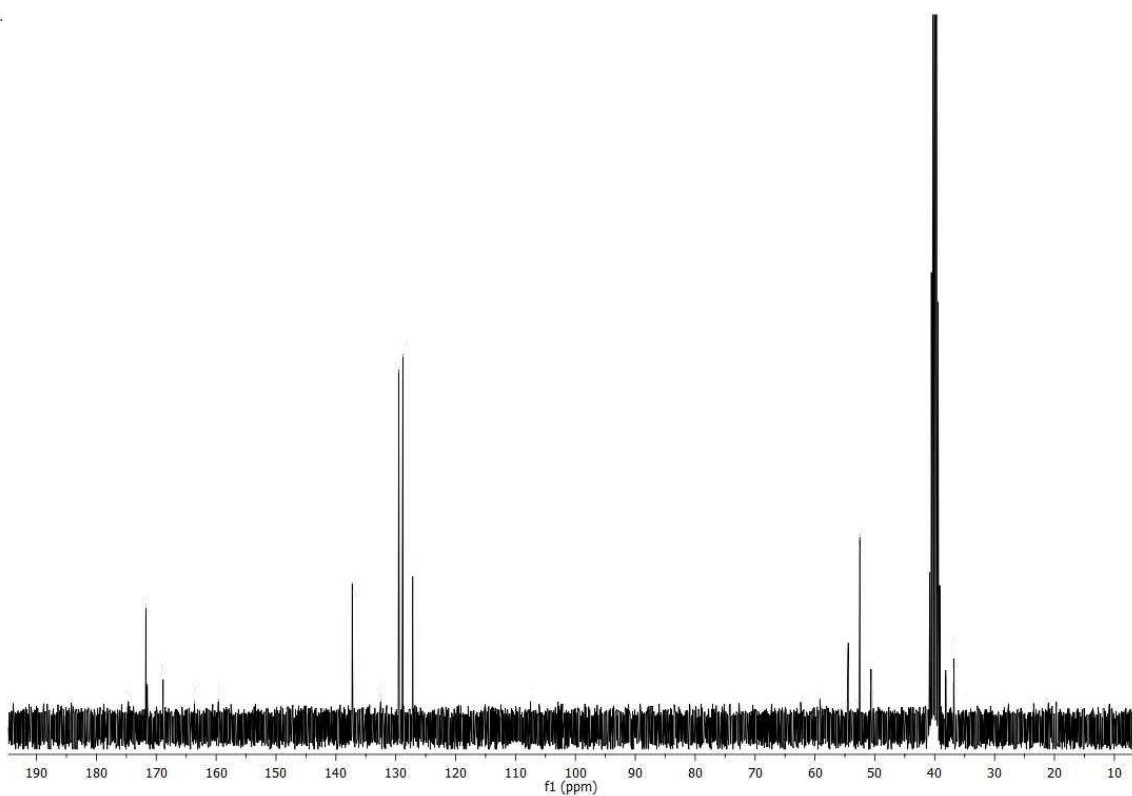

***N*-Fmoc-L-Asp-L-Phe-OMe (7)**

**<sup>1</sup>H NMR**

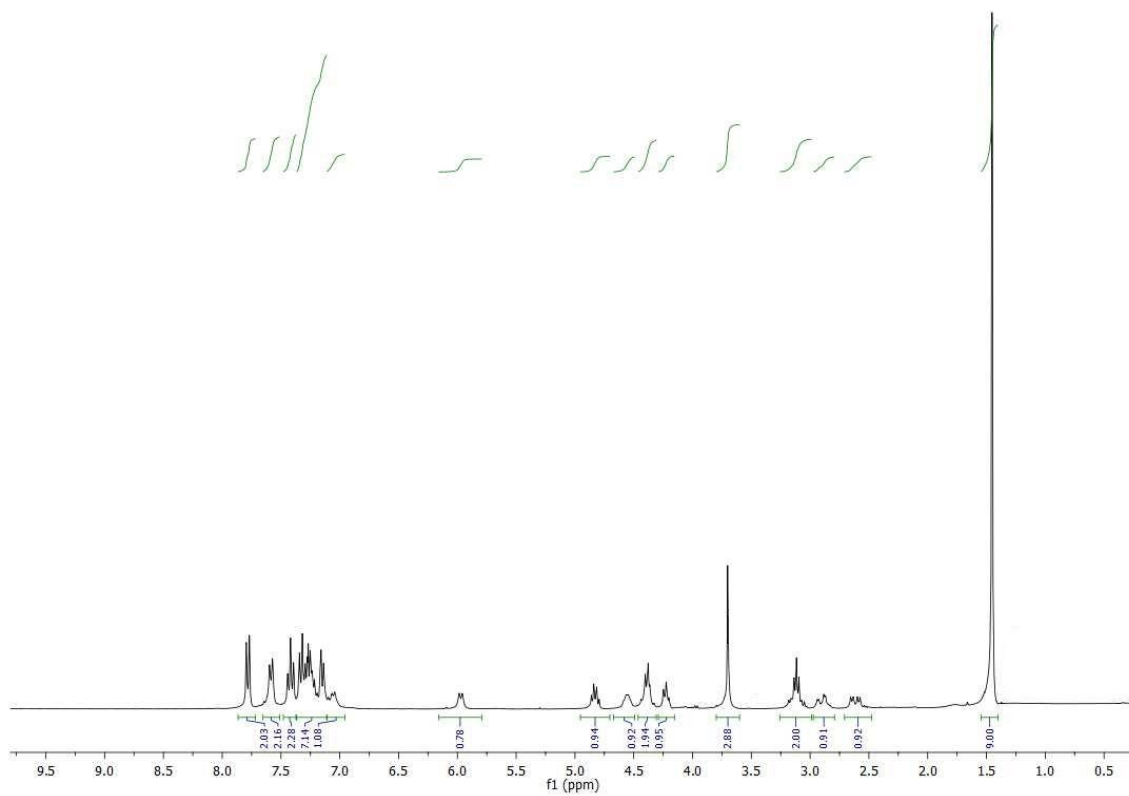

**<sup>13</sup>C NMR**

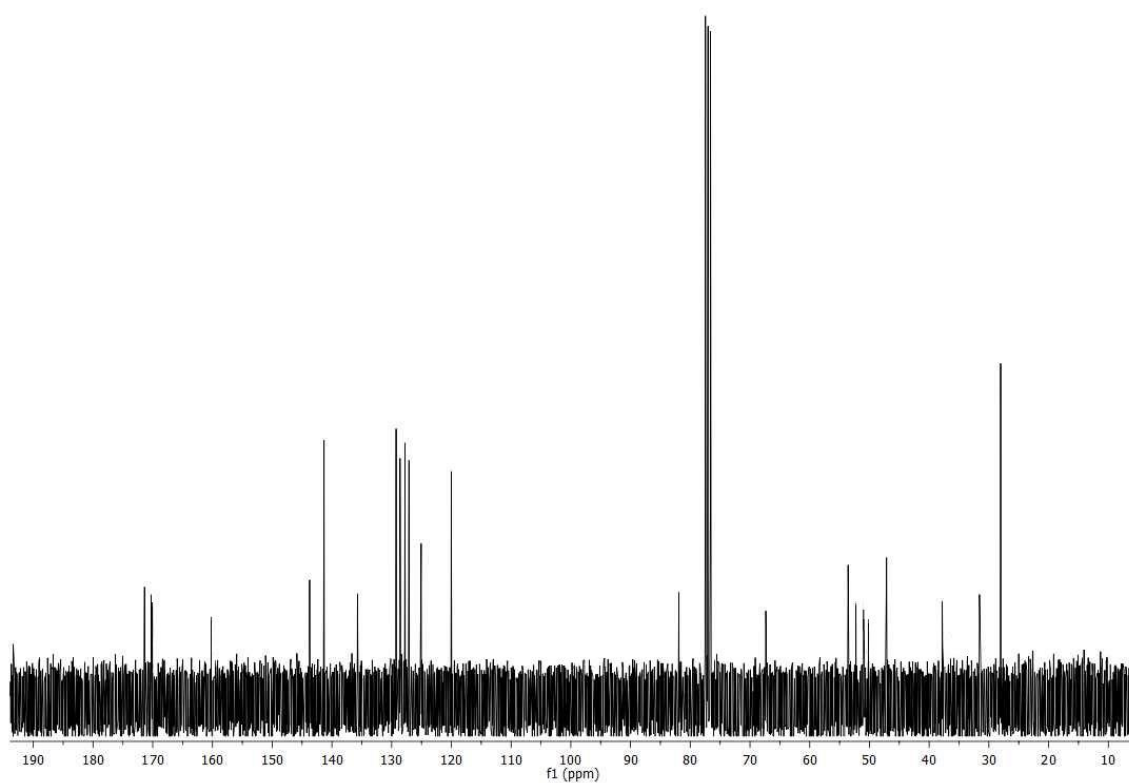

***N*-Fmoc-L-Ala-L-Ala-OMe (8)**

**<sup>1</sup>H NMR**

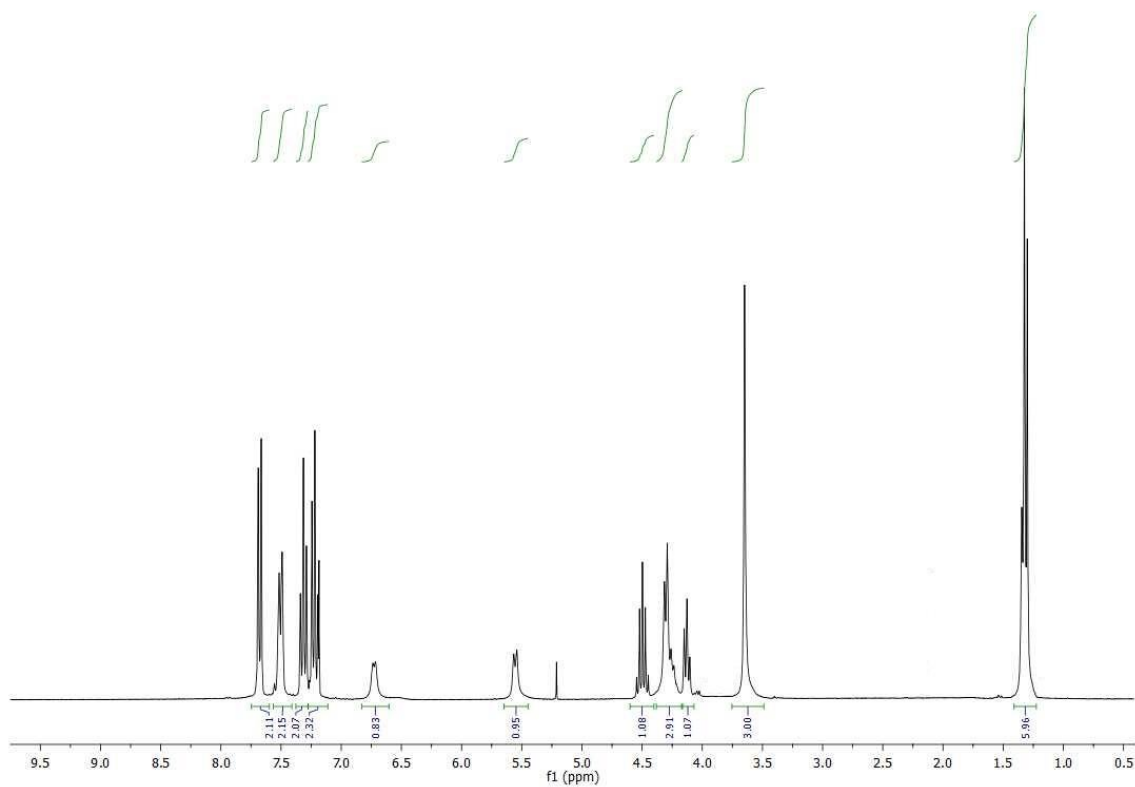

**<sup>13</sup>C NMR**

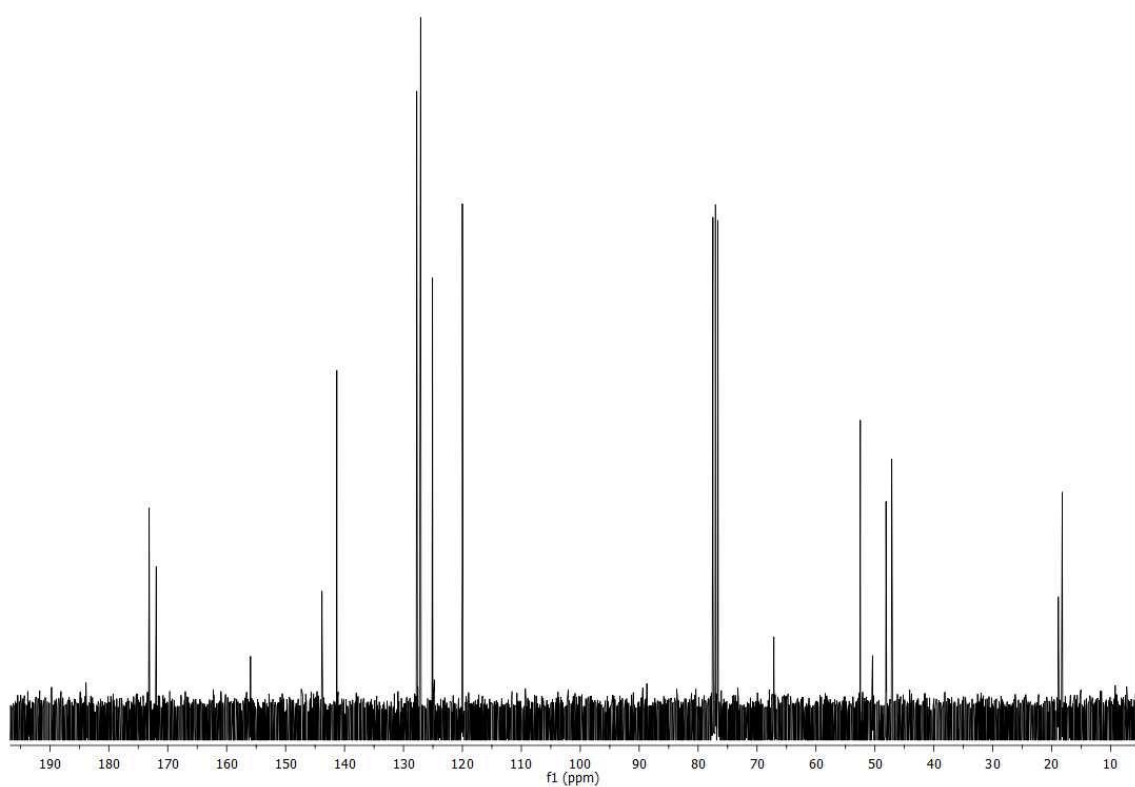

***N*-Fmoc-L-Leu-L-Ala-OMe (9)**

**<sup>1</sup>H NMR**

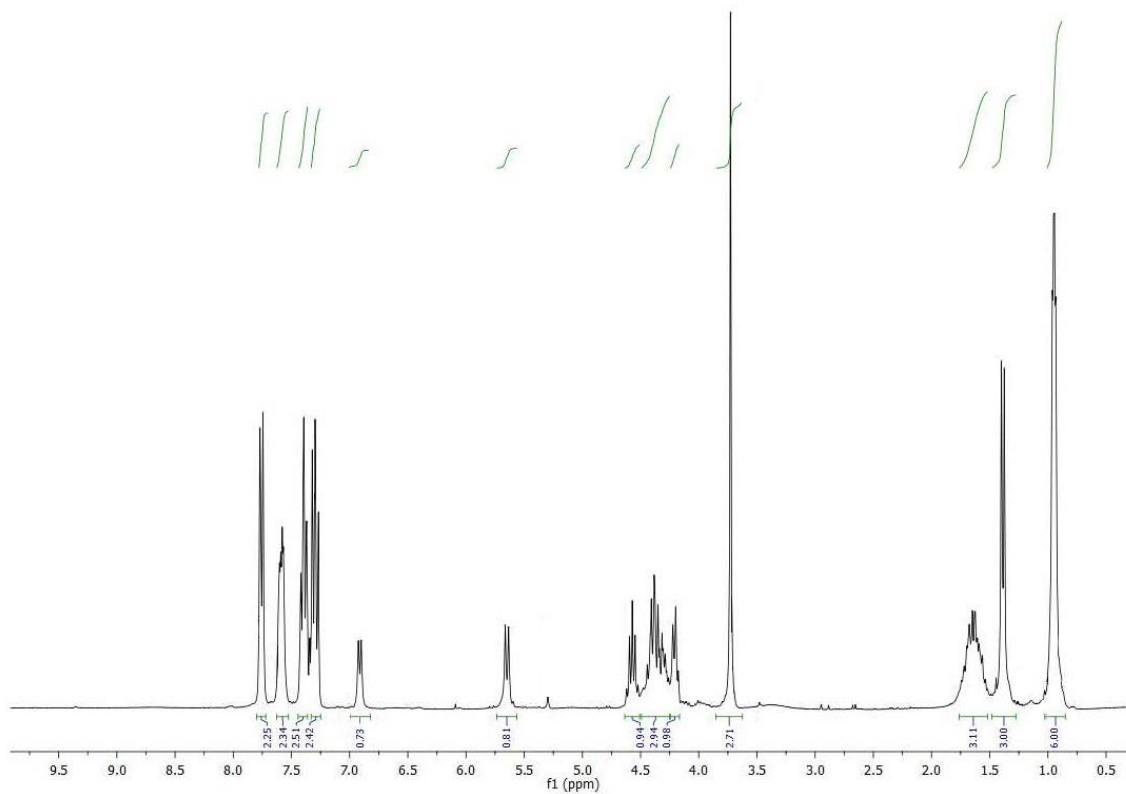

**<sup>13</sup>C NMR**

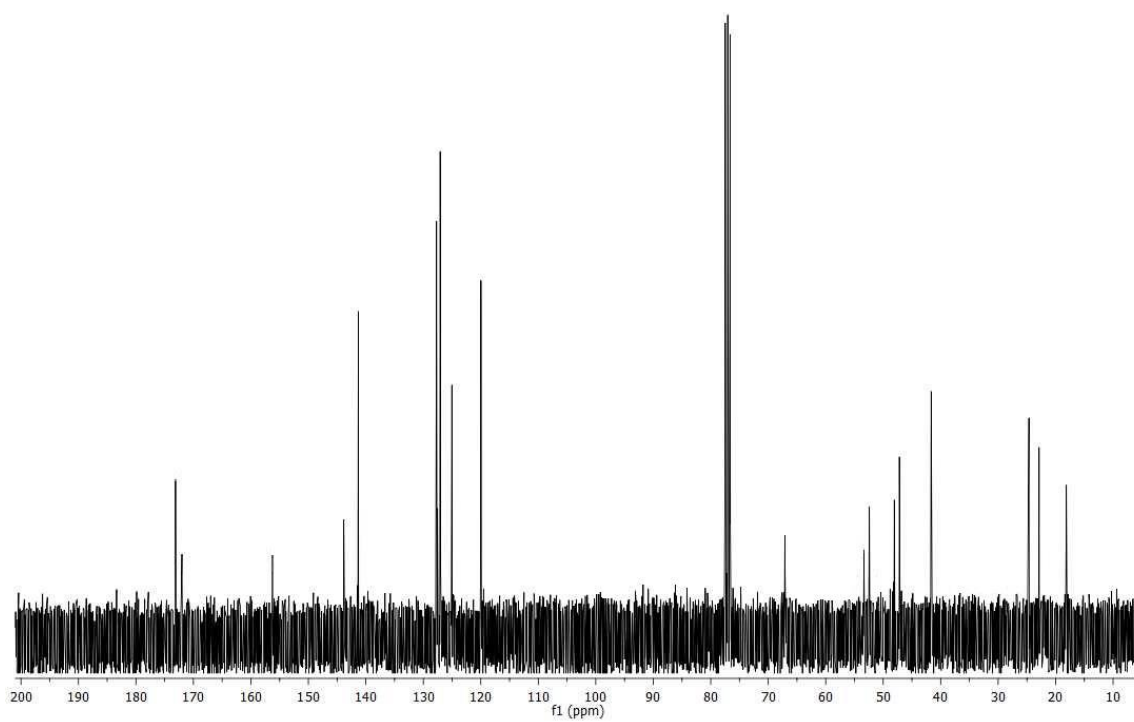



***N*-Fmoc-D-Leu-D-Ala-OMe (10)**

**<sup>1</sup>H NMR**

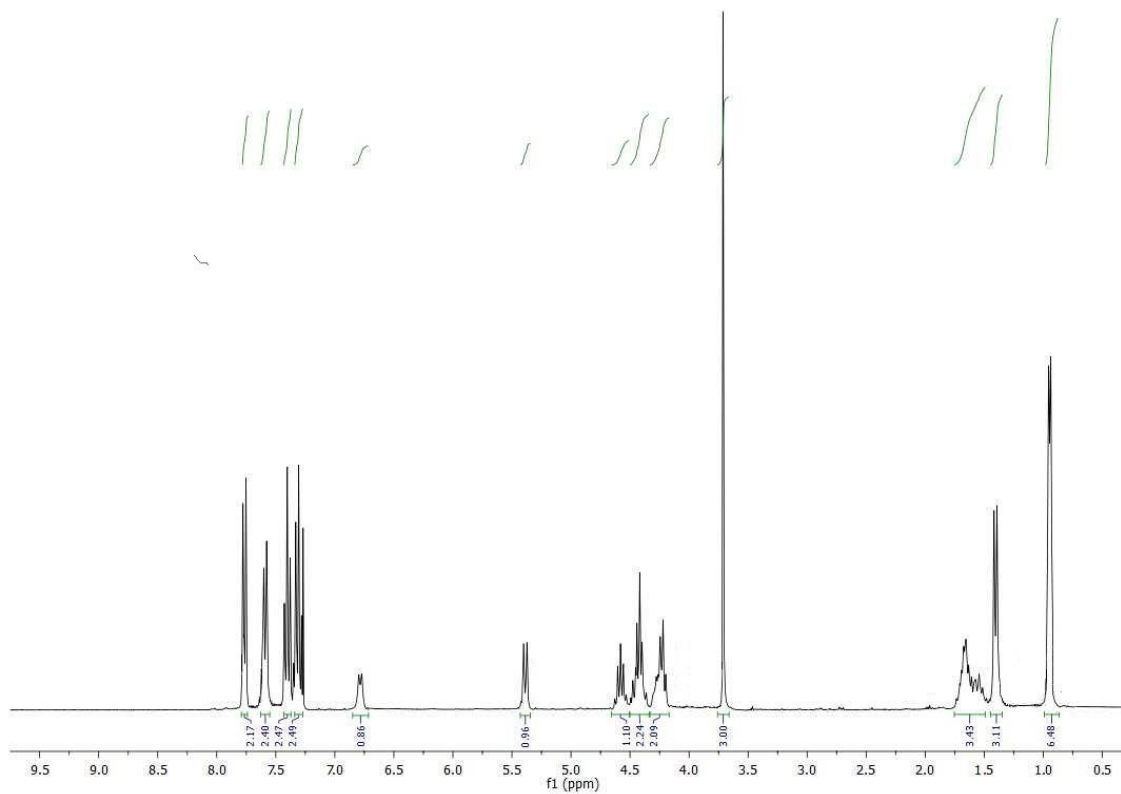

**<sup>13</sup>C NMR**

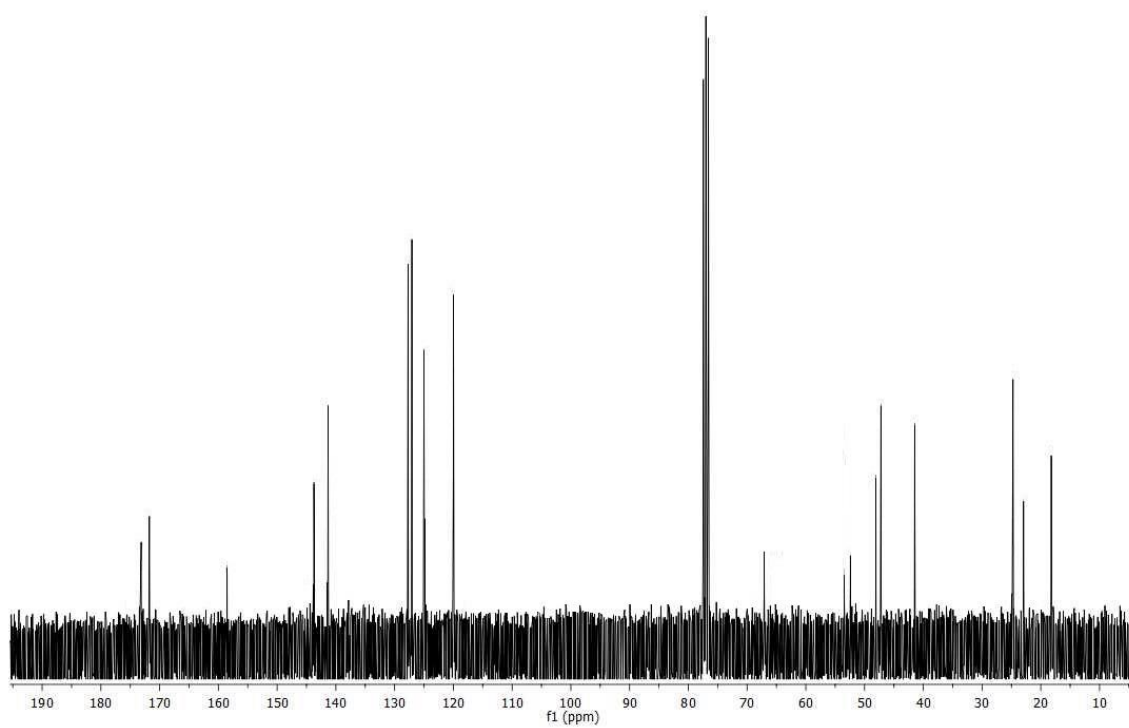

***N*-Fmoc-Gly-L-Ala-OMe (11)**

**<sup>1</sup>H NMR**

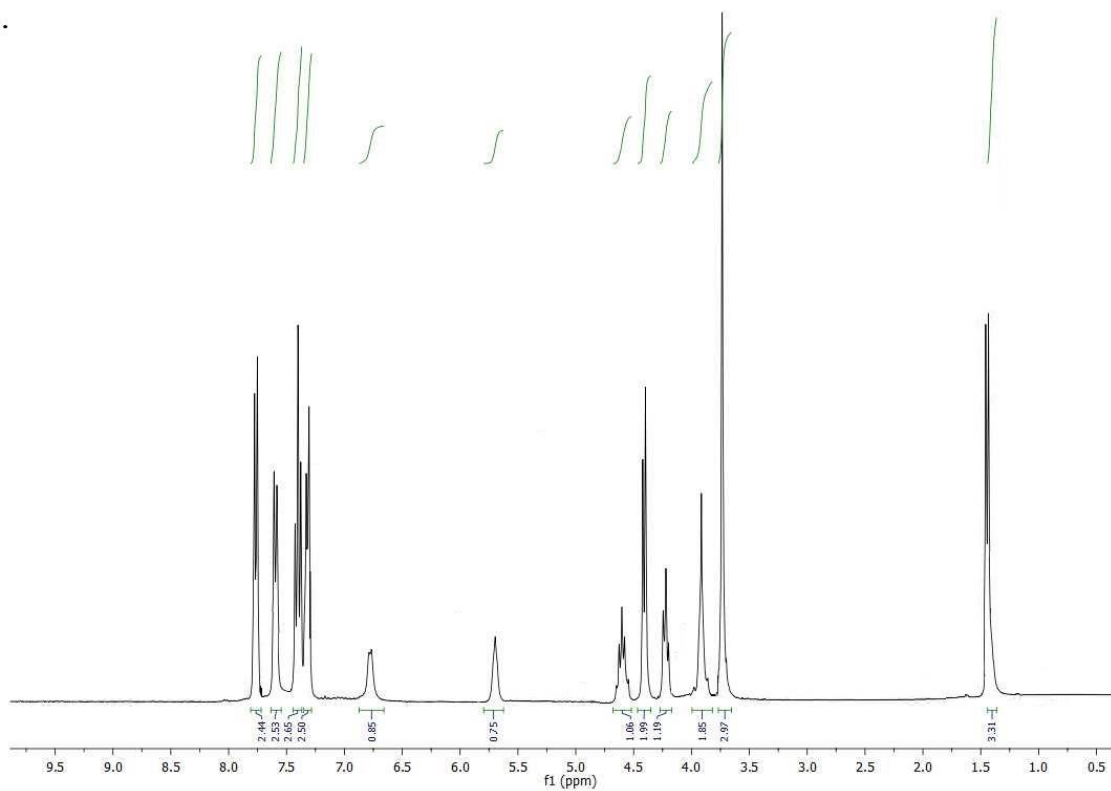

**<sup>13</sup>C NMR**

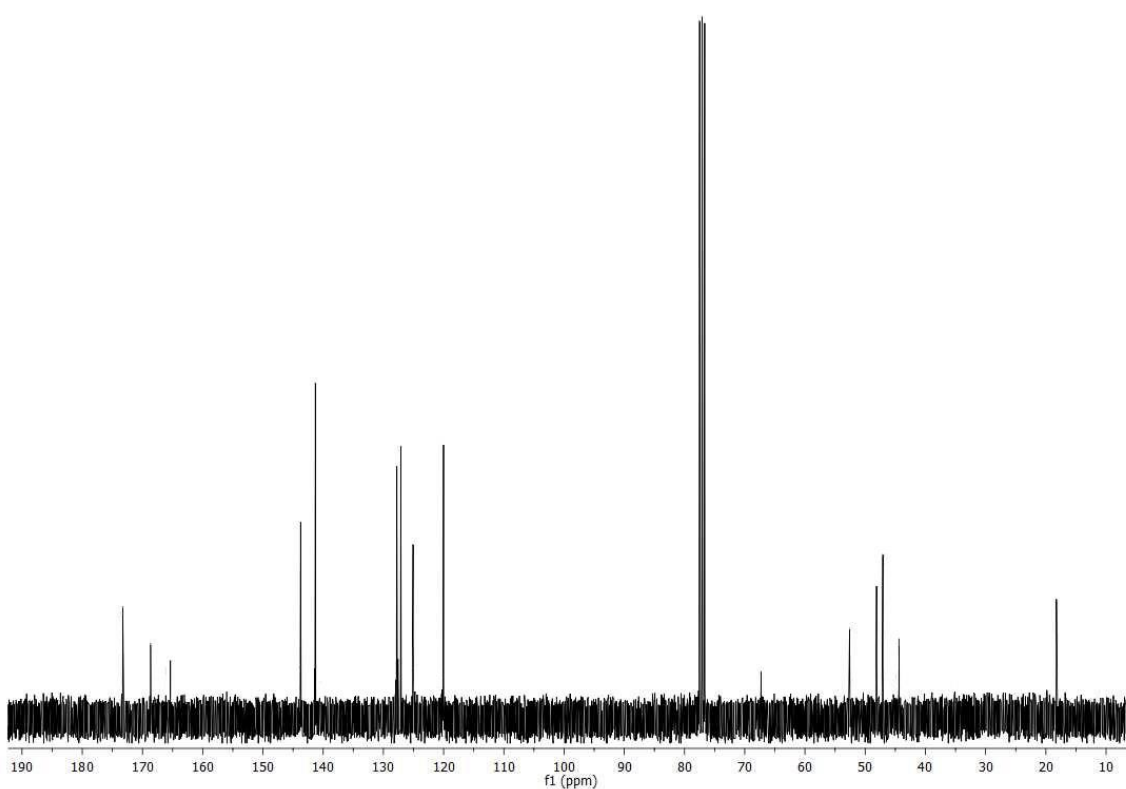

***N*-Fmoc-L-Leu-L-Ile-OMe (12)**

**<sup>1</sup>H NMR**

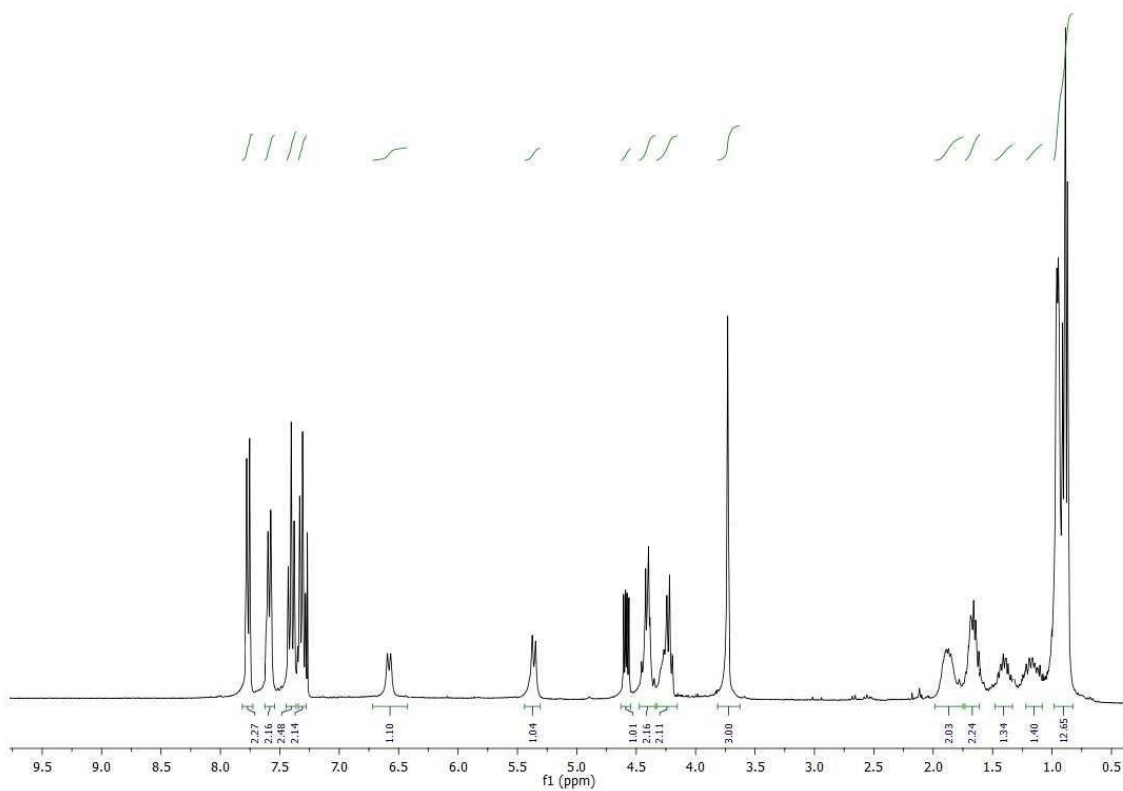

**<sup>13</sup>C NMR**

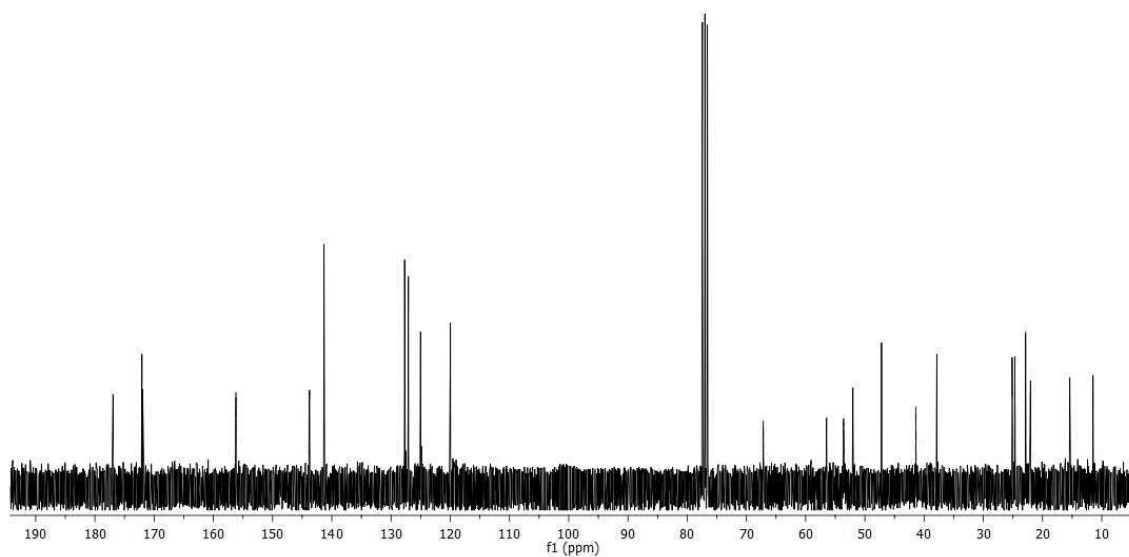

***N*-Fmoc-L-Ser(tBu)-L-Ala-OMe (13)**

**<sup>1</sup>H NMR**

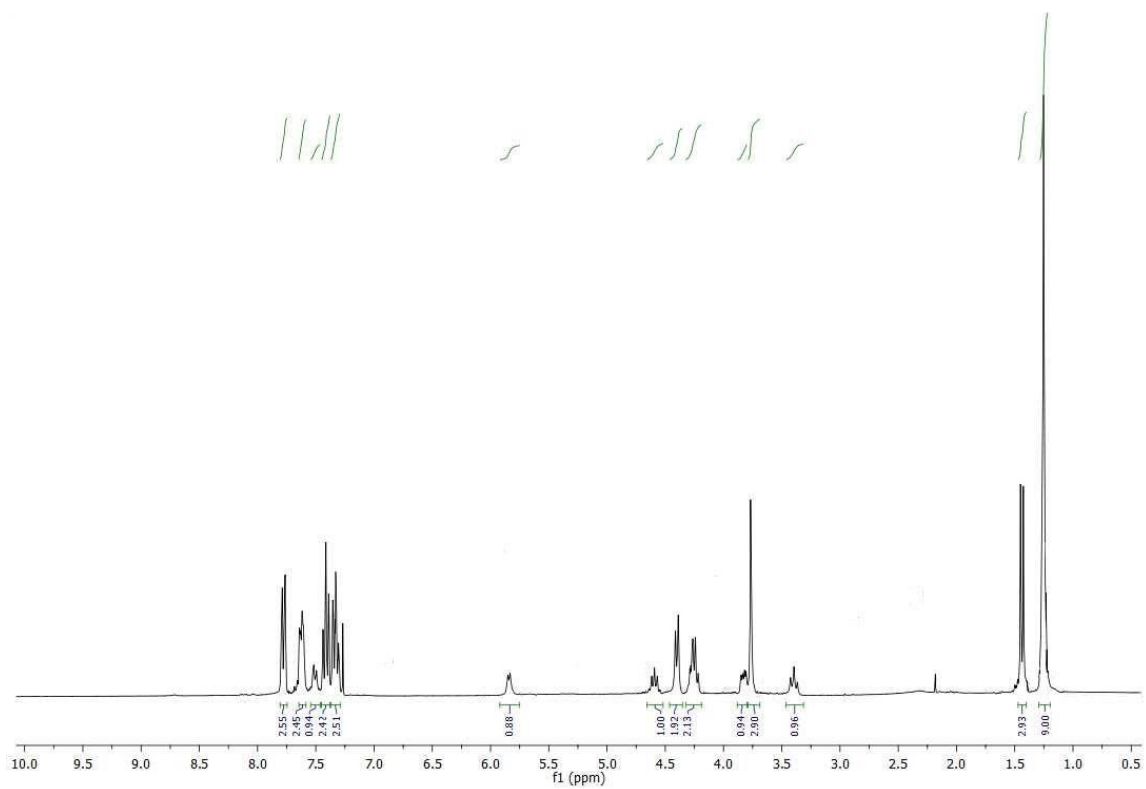

**<sup>13</sup>C NMR**

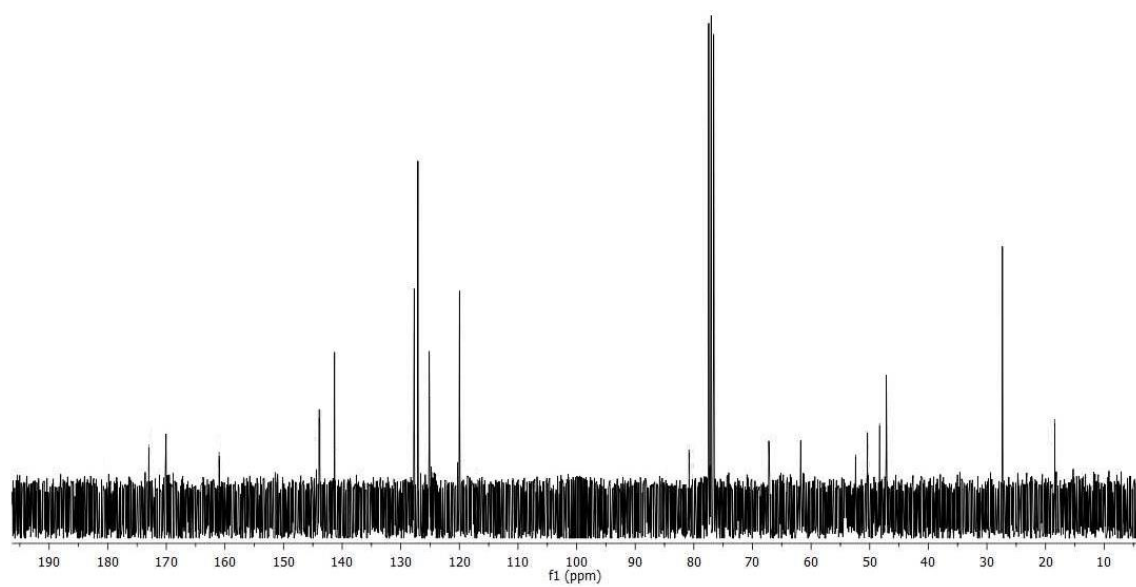

***N*-Fmoc-L-Ala-L-Cys(Bzl)-OMe (14)**

**<sup>1</sup>H NMR**

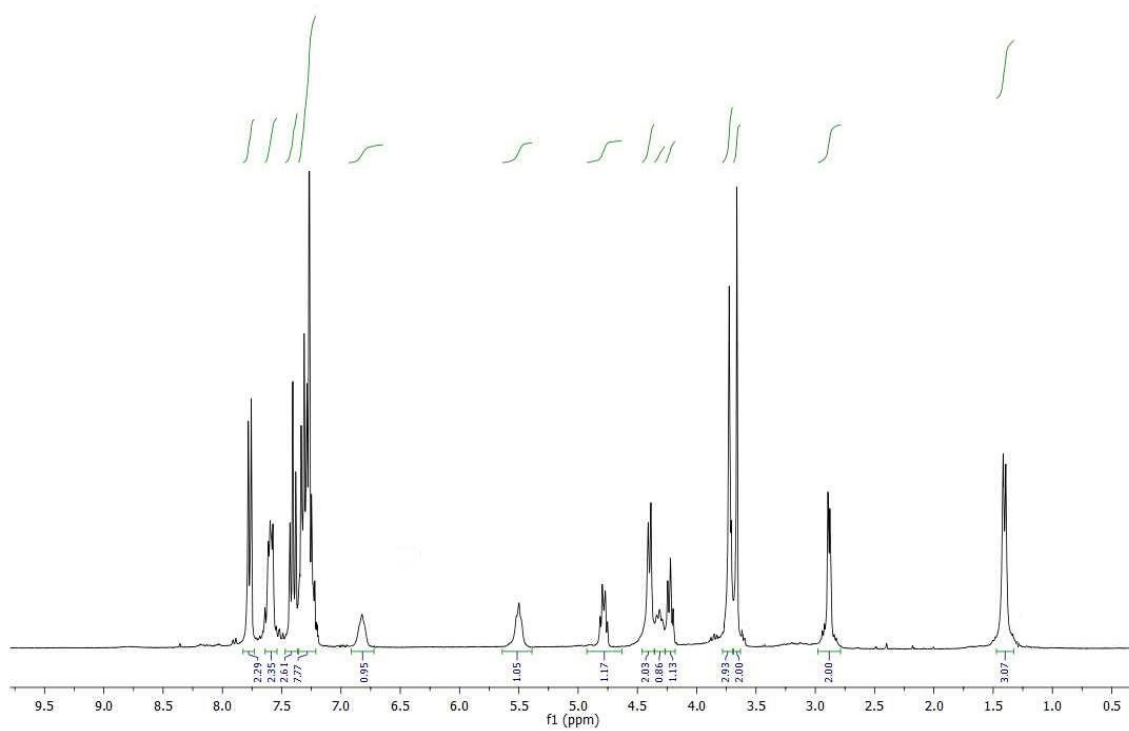

**<sup>13</sup>C NMR**

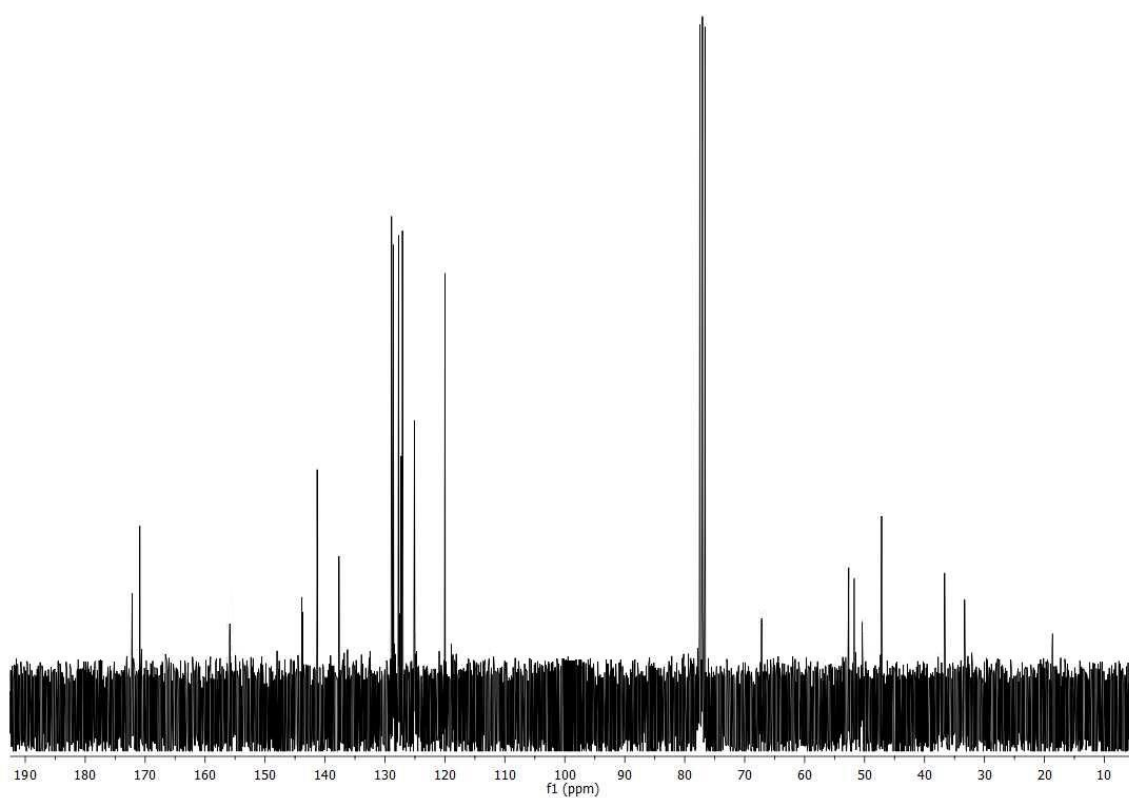

***N*-Fmoc-L-Ala-L-Lys(Boc)-OMe (15)**

**<sup>1</sup>H NMR**

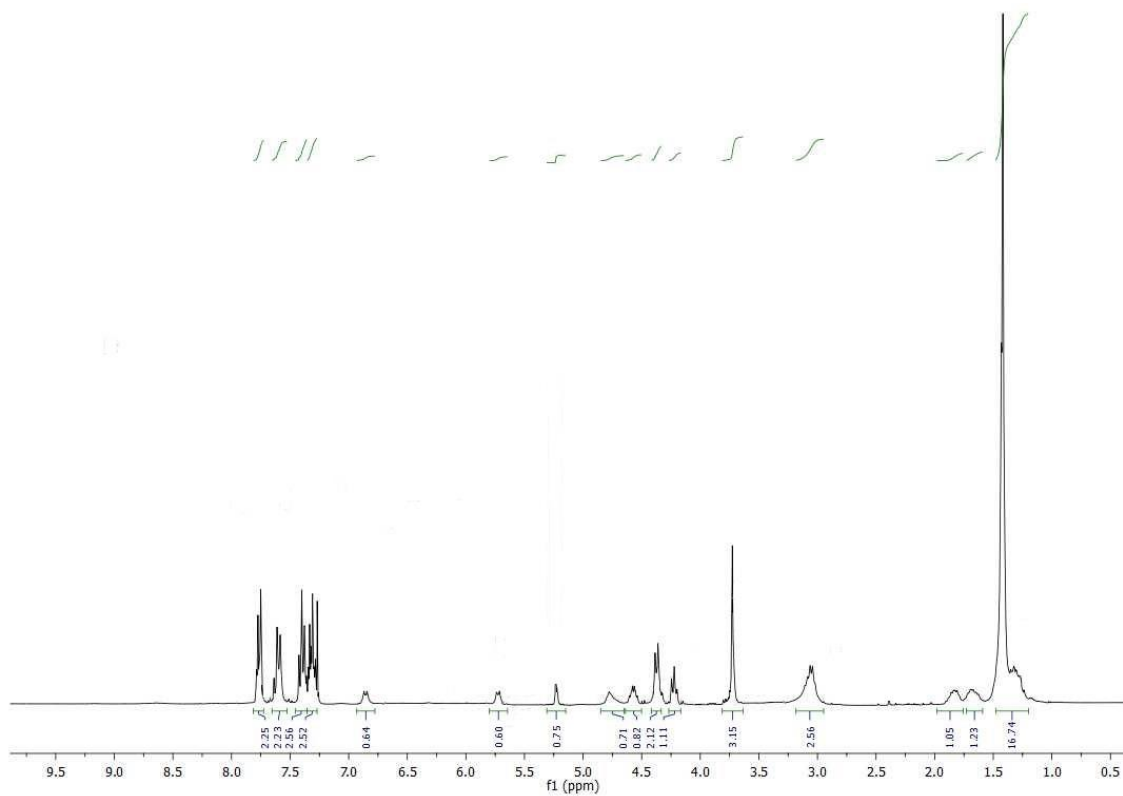

**<sup>13</sup>C NMR**

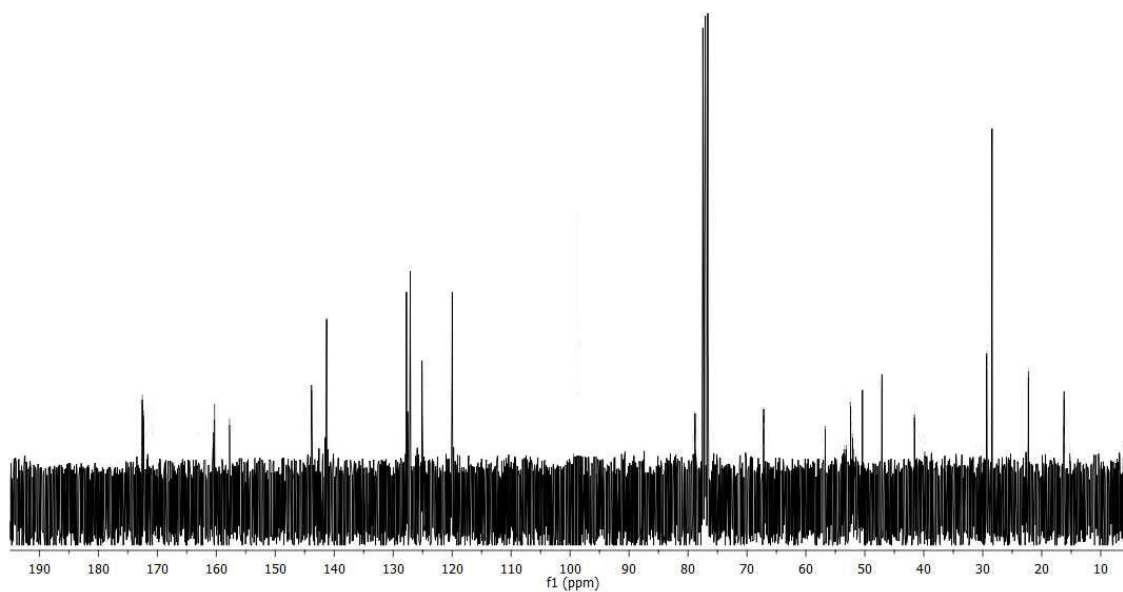

***N*-Fmoc-L-Cys(Bzl)-L-Ala-OMe (16)**

**<sup>1</sup>H NMR**

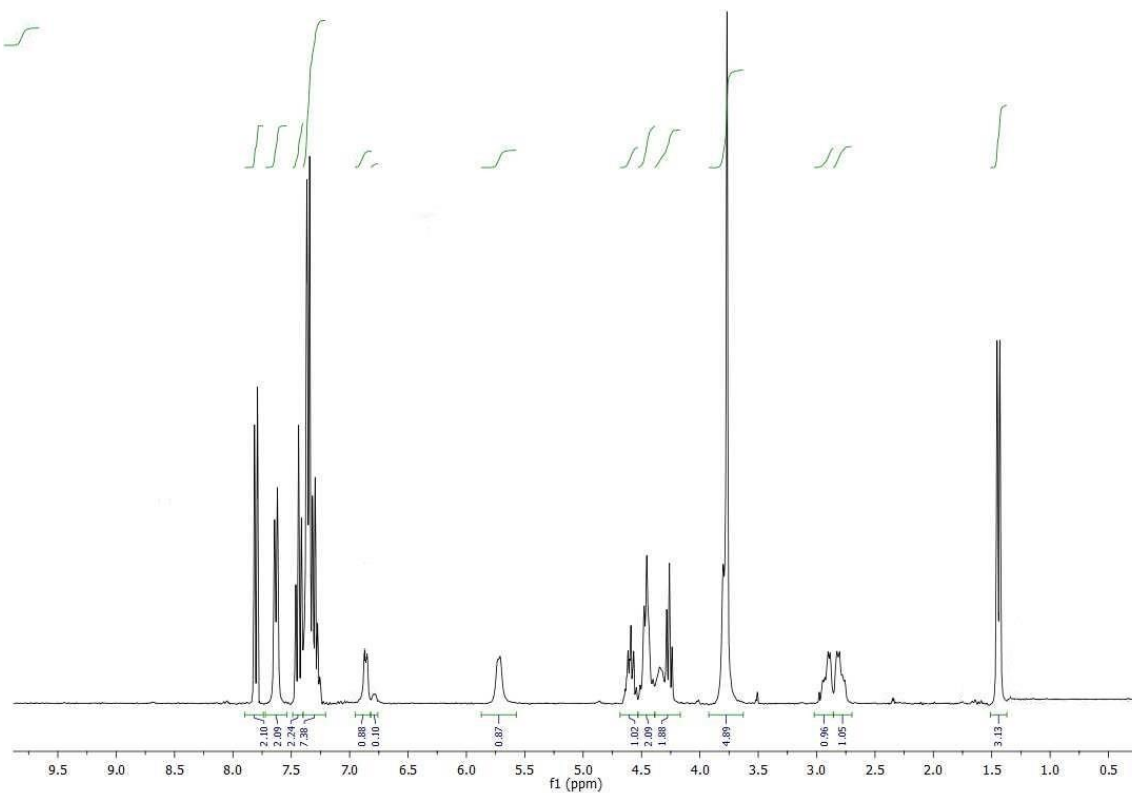

**<sup>13</sup>C NMR**

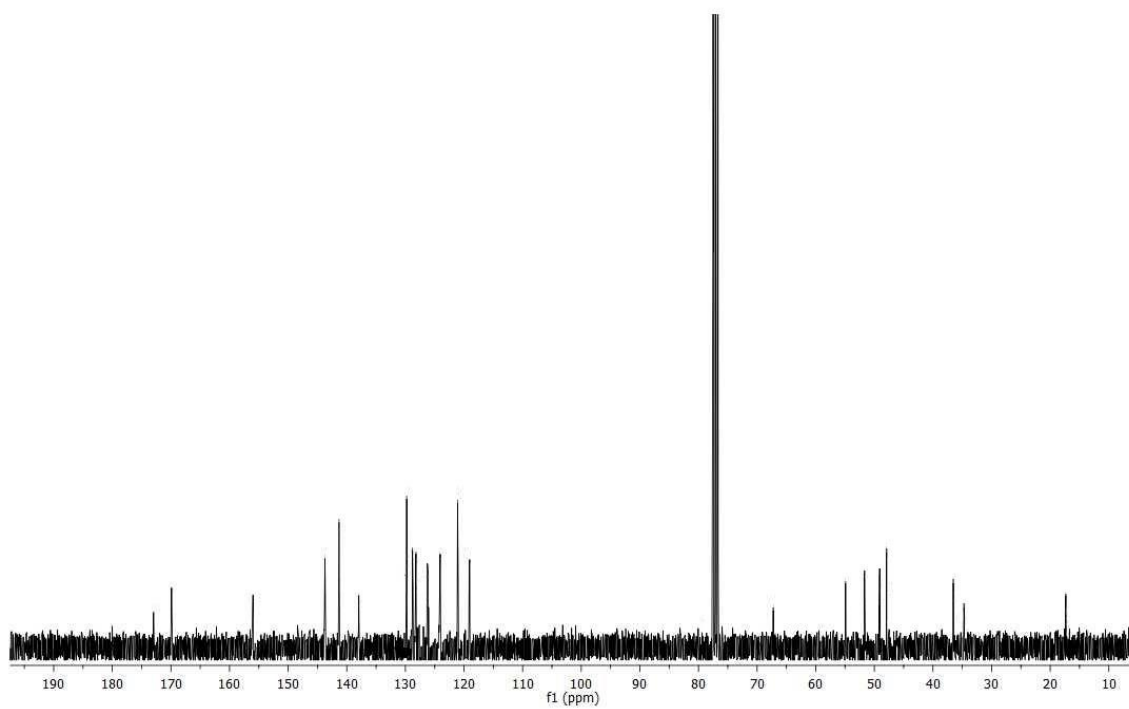

***N*-Fmoc-D-Cys(Bzl)-L-Ala-OMe (17)**

**<sup>1</sup>H NMR**

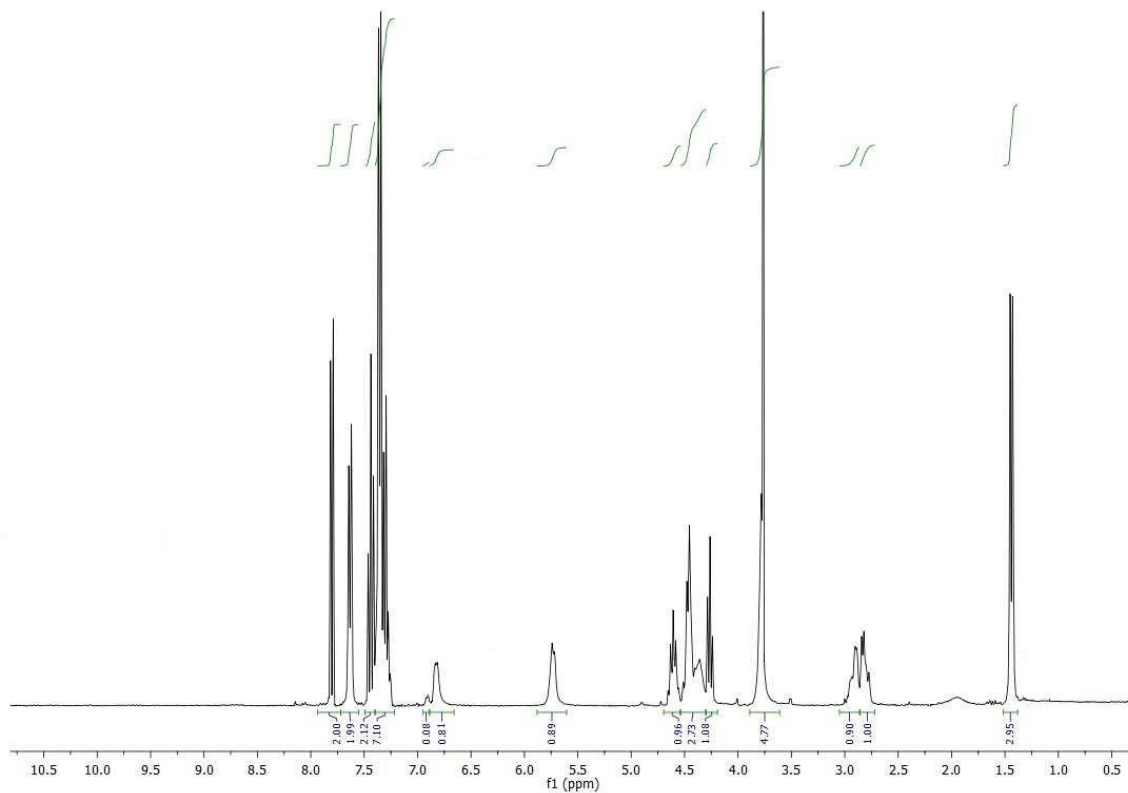

**<sup>13</sup>C NMR**

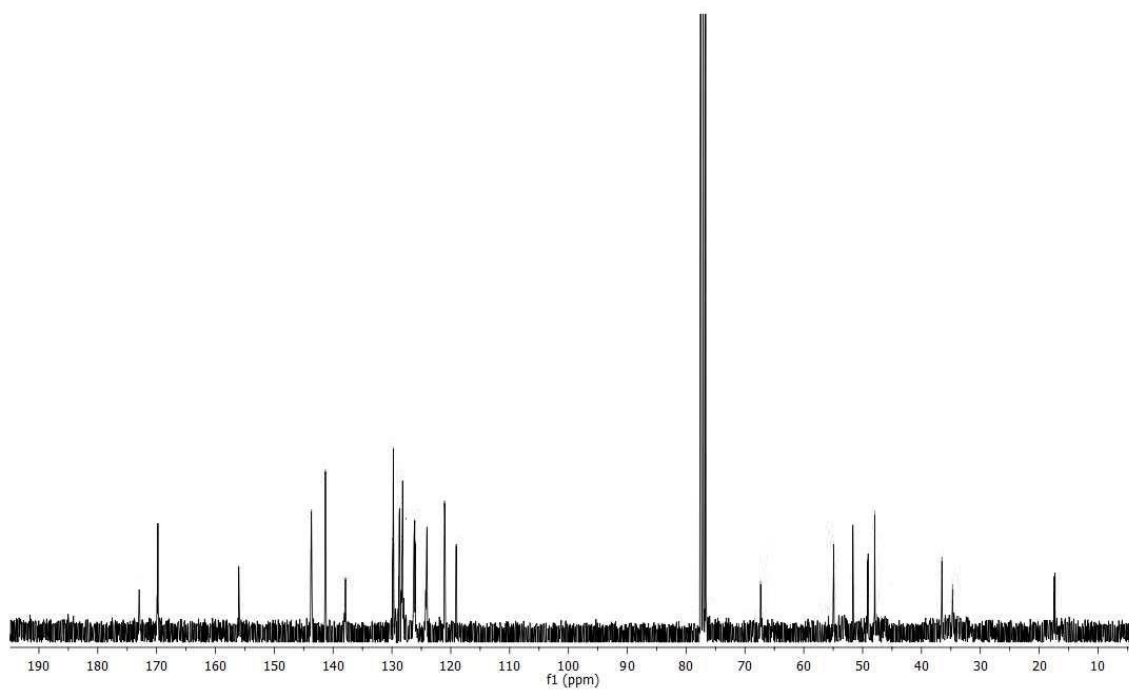



***N*-Cbz-L-Ala-L-Ala-OMe (18)**

**<sup>1</sup>H NMR**

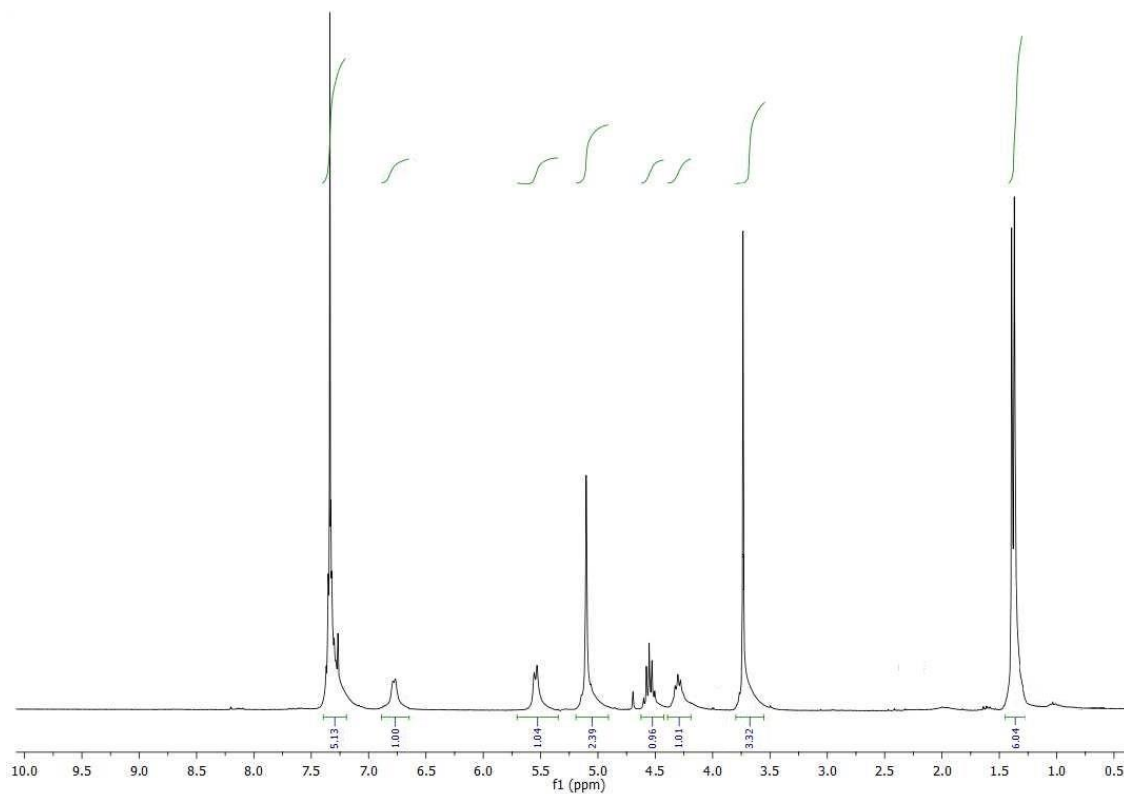

**<sup>13</sup>C NMR**

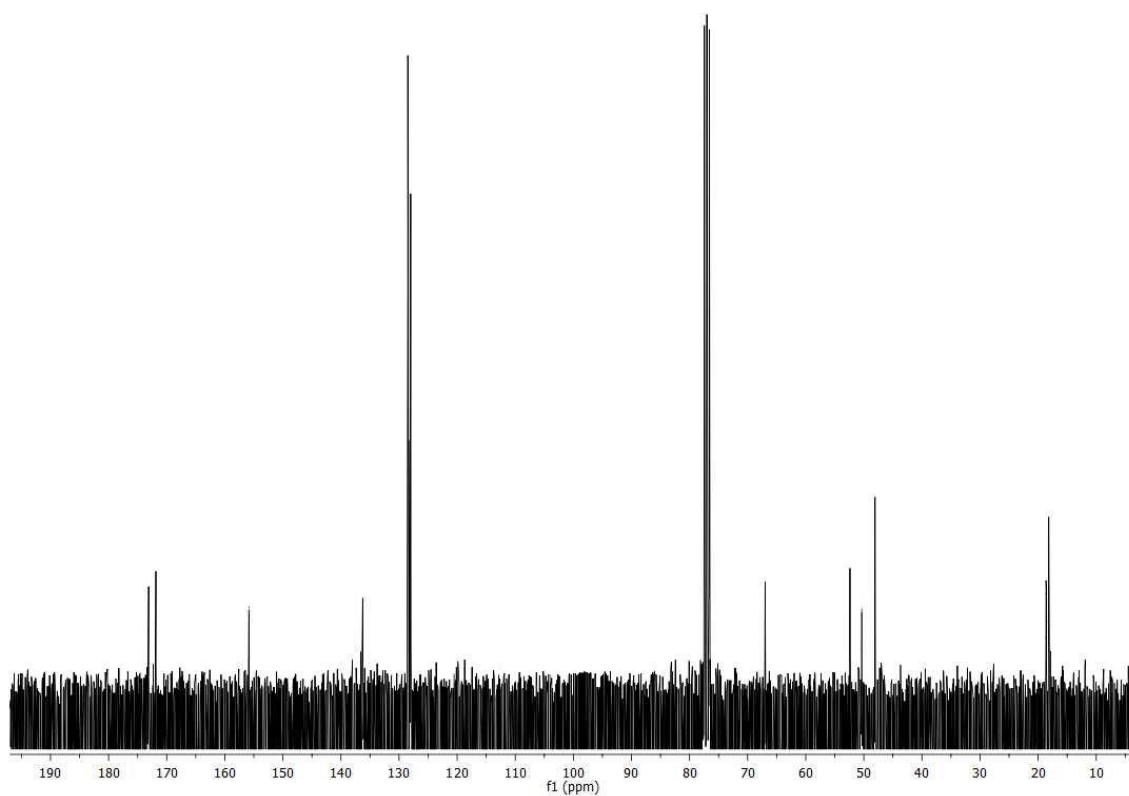

# MS (EI)

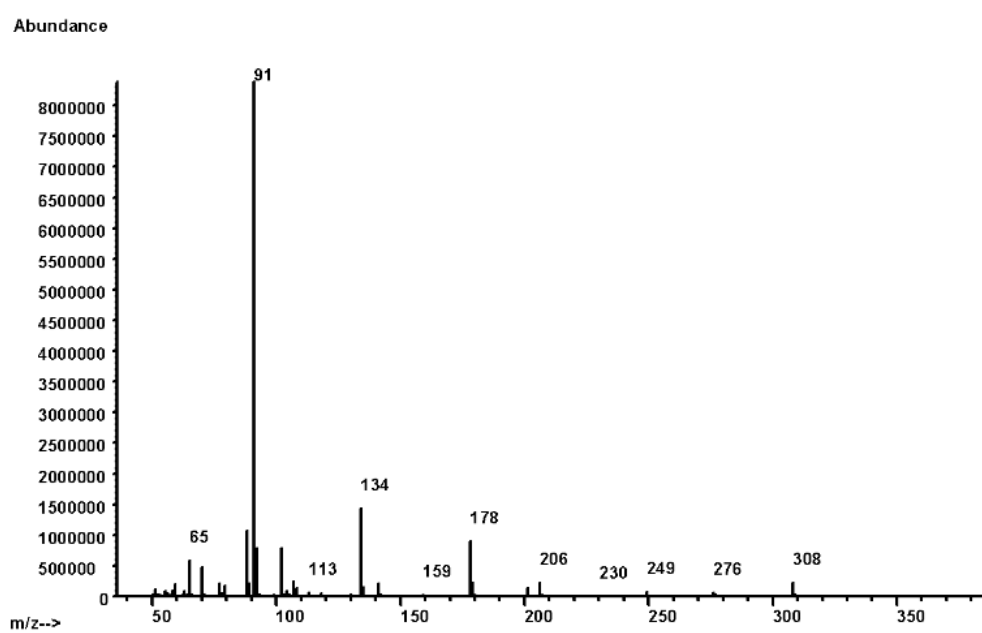

***N*-Cbz-D-Ala-L-Ala-OMe (19)**

**<sup>1</sup>H NMR**

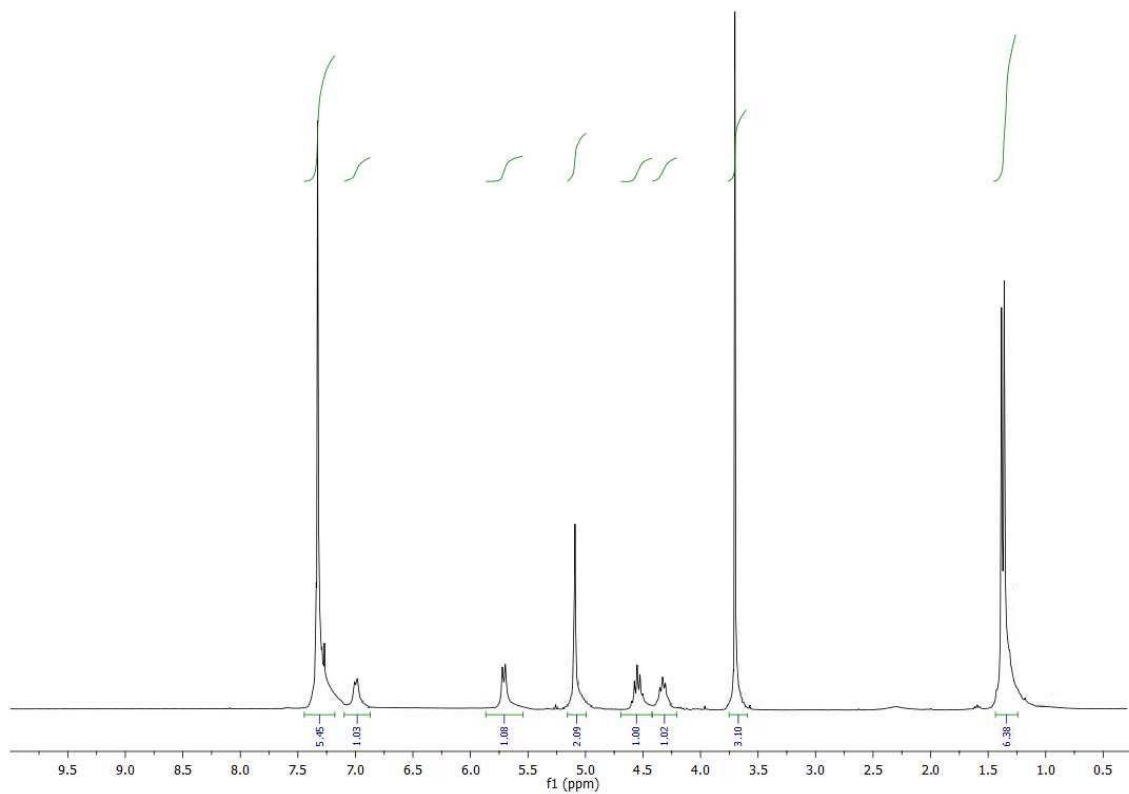

**<sup>13</sup>C NMR**

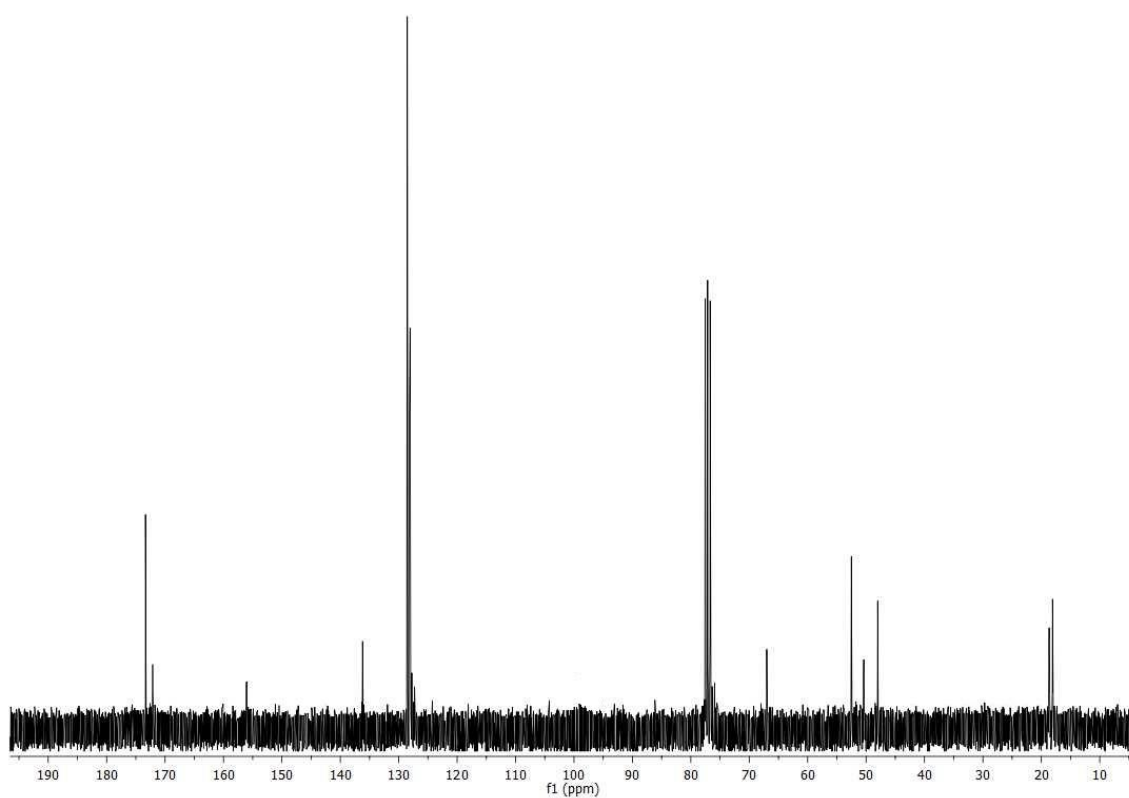

# MS (EI)

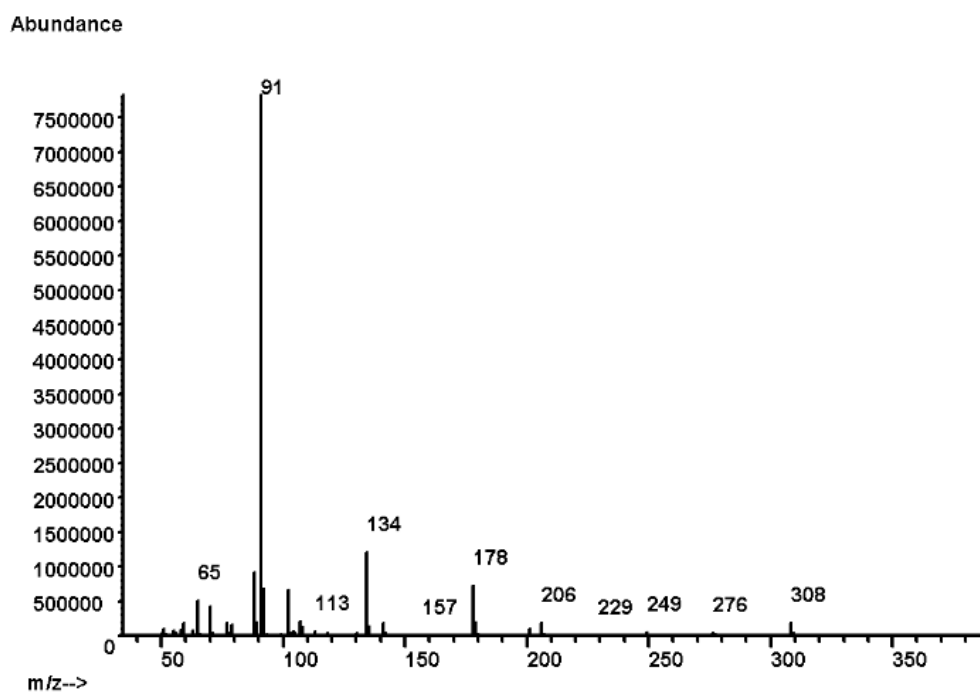

***N*-Ns-L-Phe-L-Ala-OMe (20)**

**<sup>1</sup>H NMR**

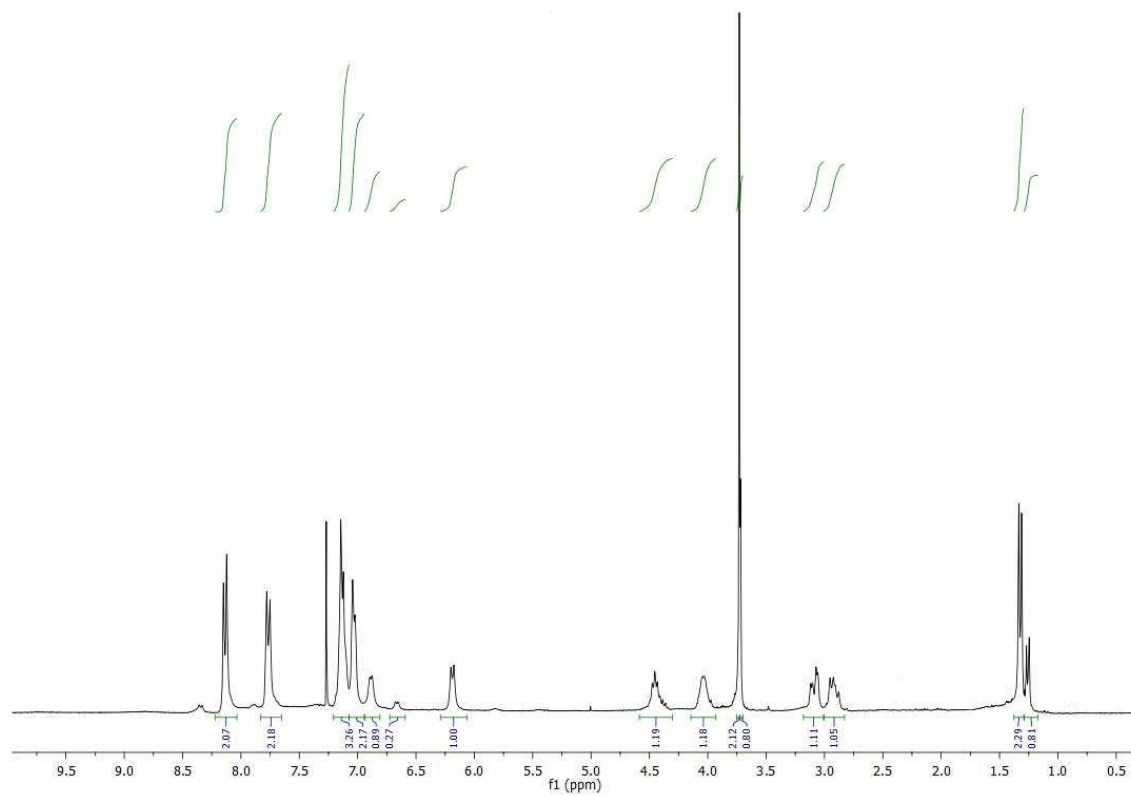

**<sup>13</sup>C NMR**

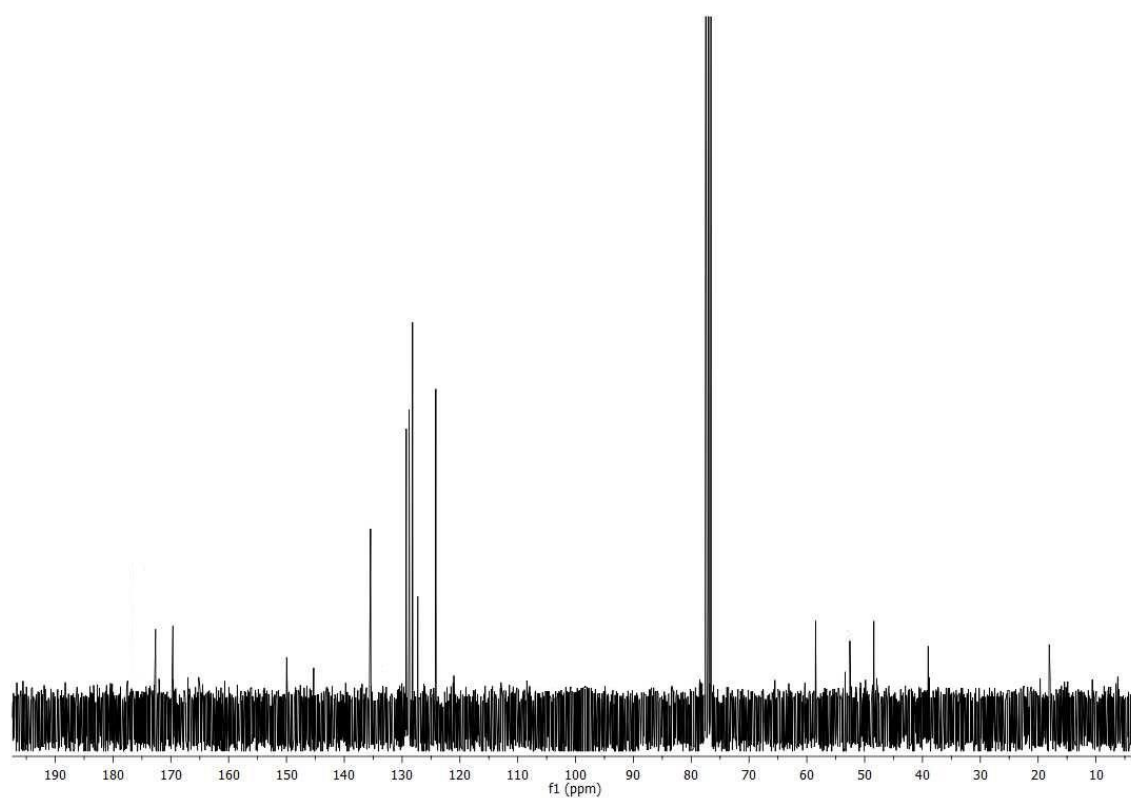

# GC/MS (EI)

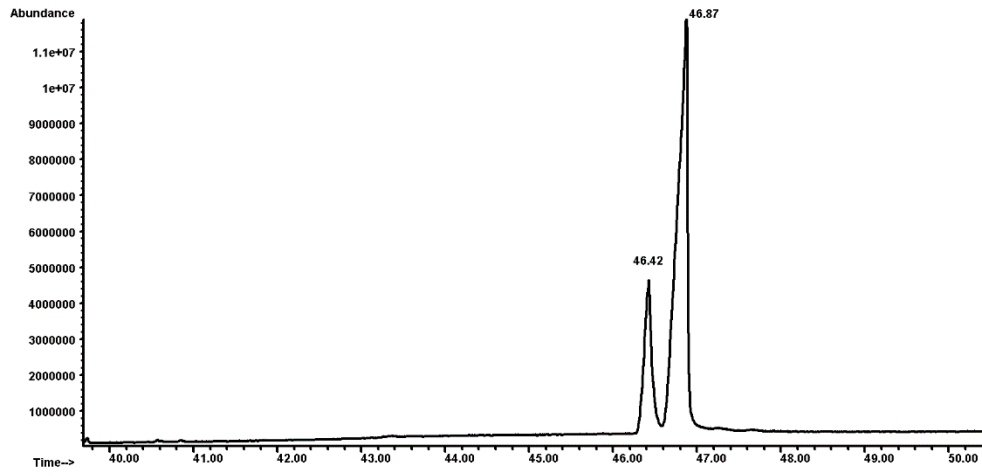

# MS (EI)

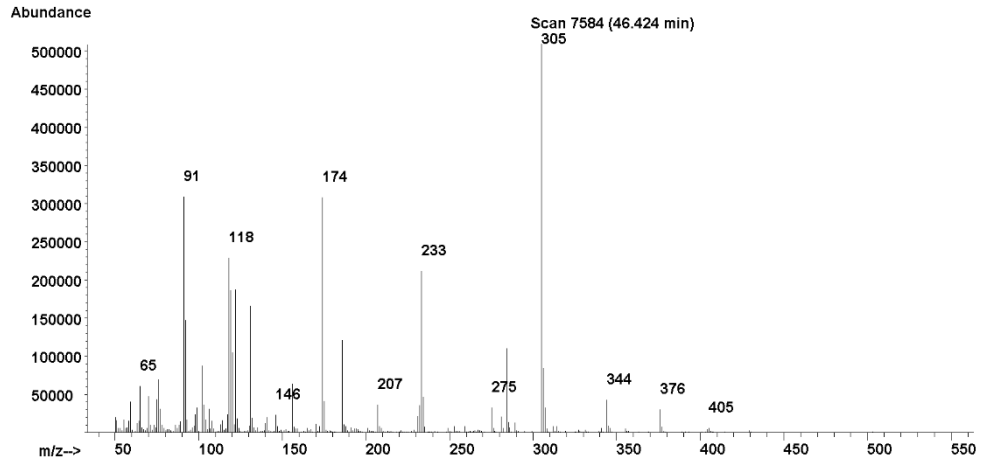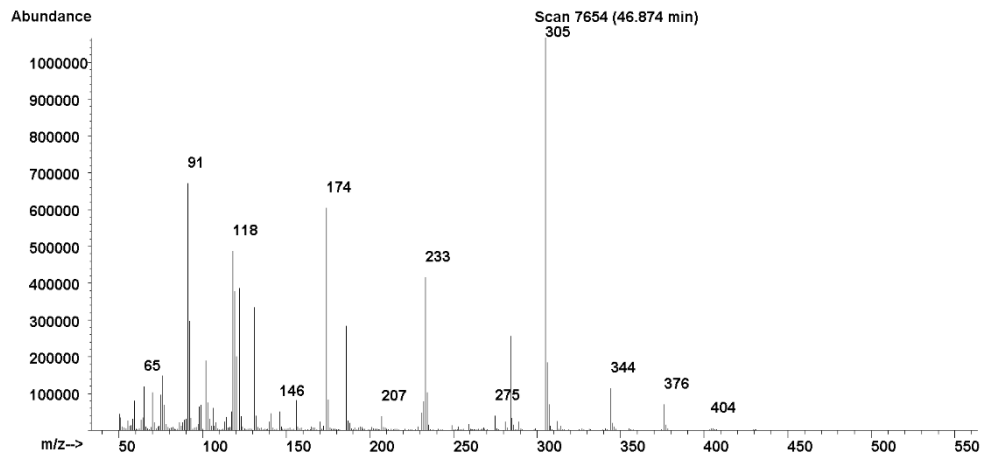

***N*-Boc-L-Ala-L-Ala-OMe (3)**

**GC/MS (EI)**

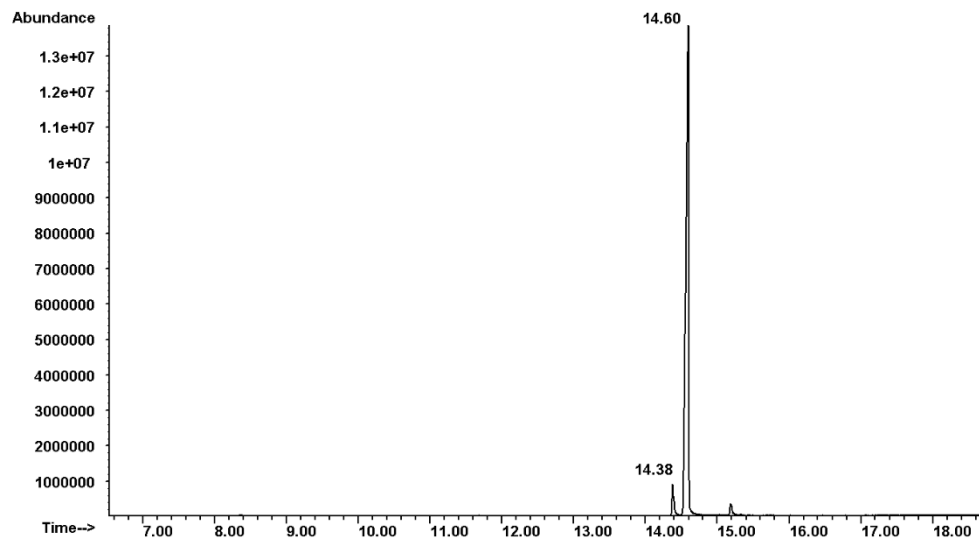

***N*-Boc-D-Ala-L-Ala-OMe (4)**

**GC/MS (EI)**

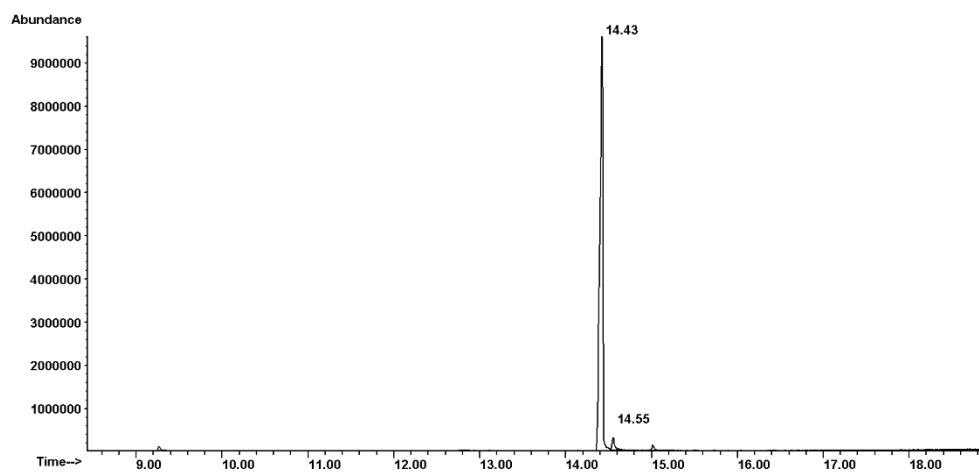



***N*-Boc-L-Ala-L-Ala-OMe (3) and *N*-Boc-D-Ala-L-Ala-OMe (4) (4 : 6)**

**<sup>1</sup>H NMR**

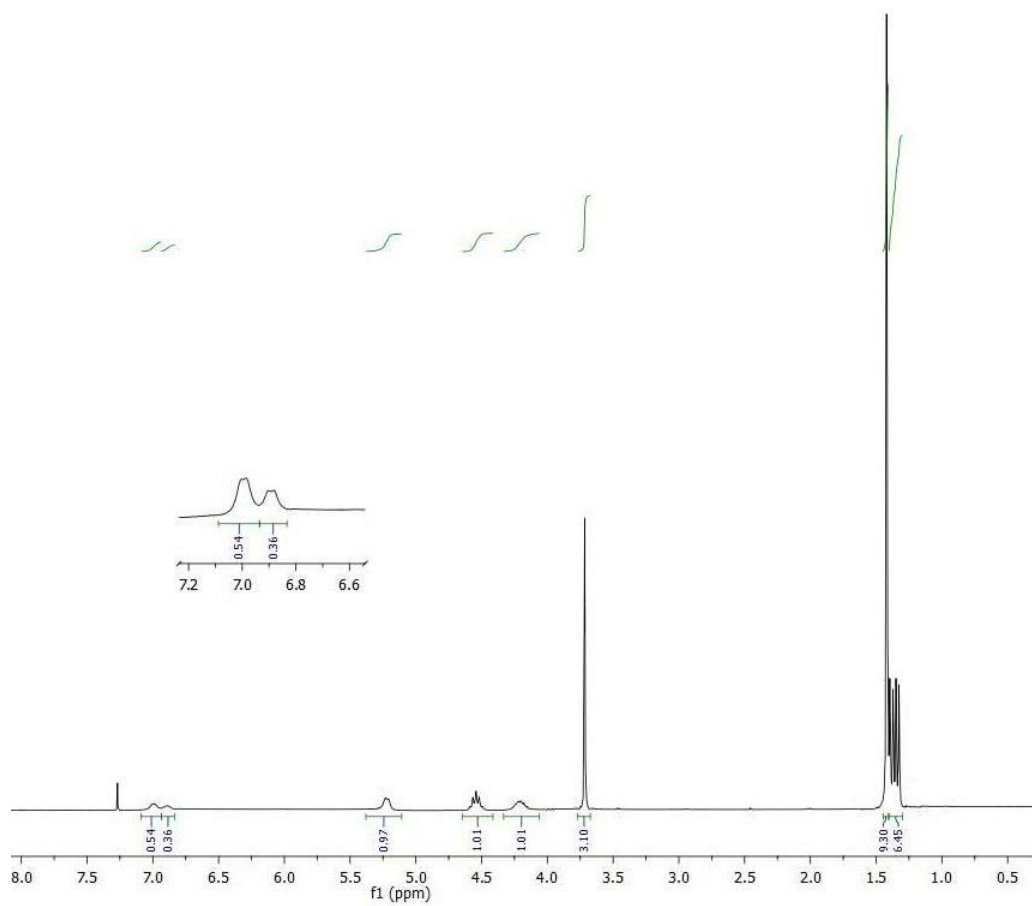

***N*-Fmoc-L-Leu-L-Ala-OMe (9) and *N*-Fmoc-D-Leu-L-Ala-OMe (10) (5.8 : 4.2)**

**<sup>1</sup>H NMR**

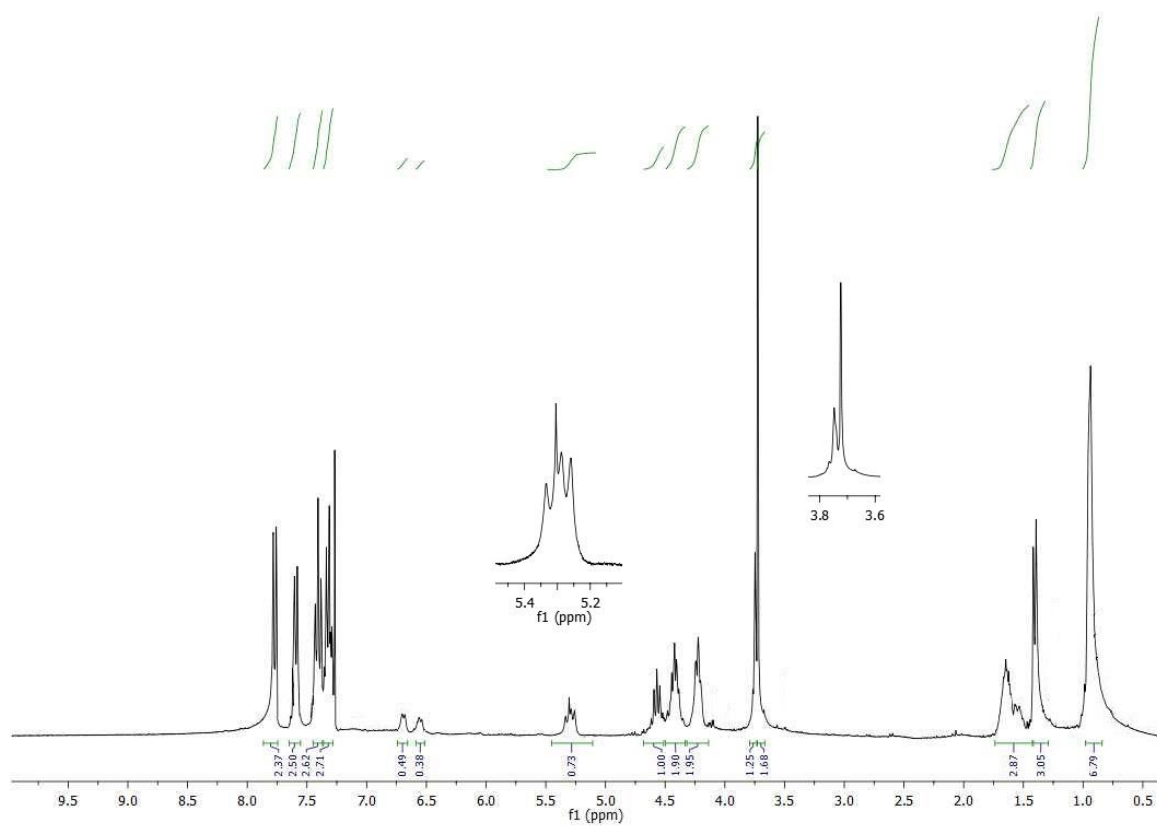

***N*-Cbz-L-Ala-L-Ala-OMe (16)**

**GC/MS (EI)**

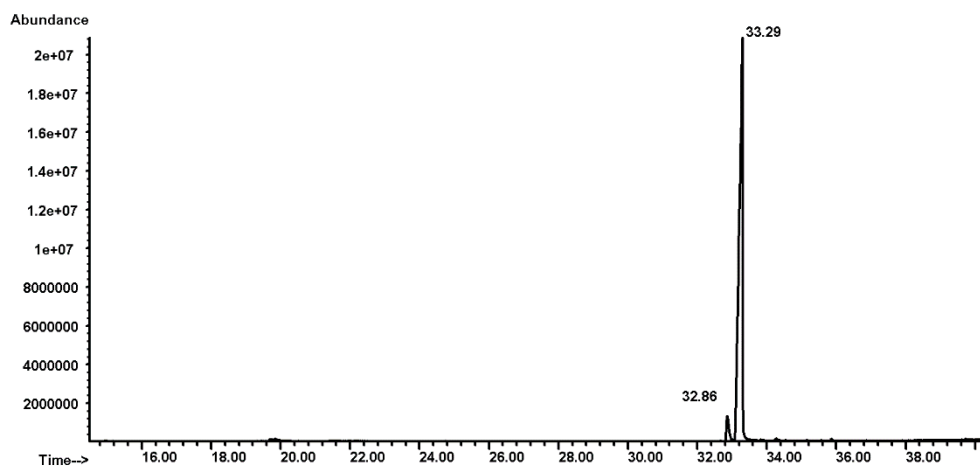

***N*-Cbz-D-Ala-L-Ala-OMe (17)**

**GC/MS (EI)**

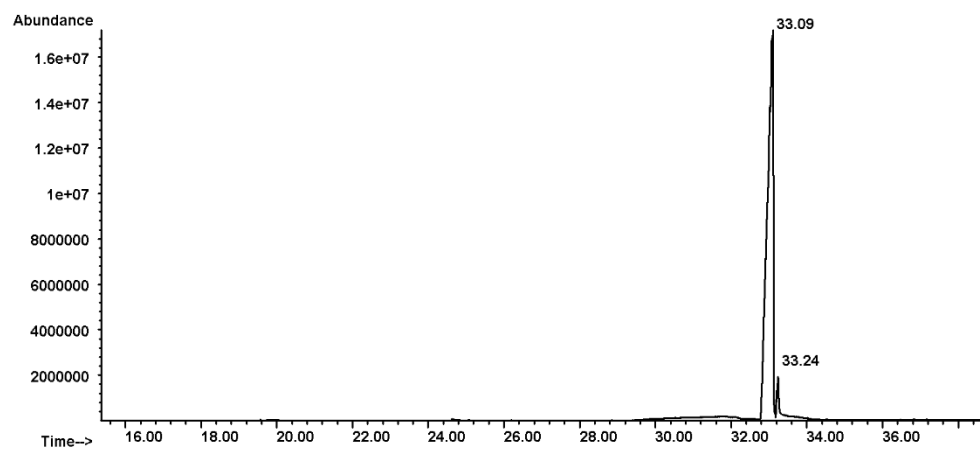

***N*-Cbz-L-Ala-L-Ala-OMe (16) and *N*-Cbz-D-Ala-L-Ala-OMe (17) (5.8 : 4.2)**

**<sup>1</sup>H NMR**

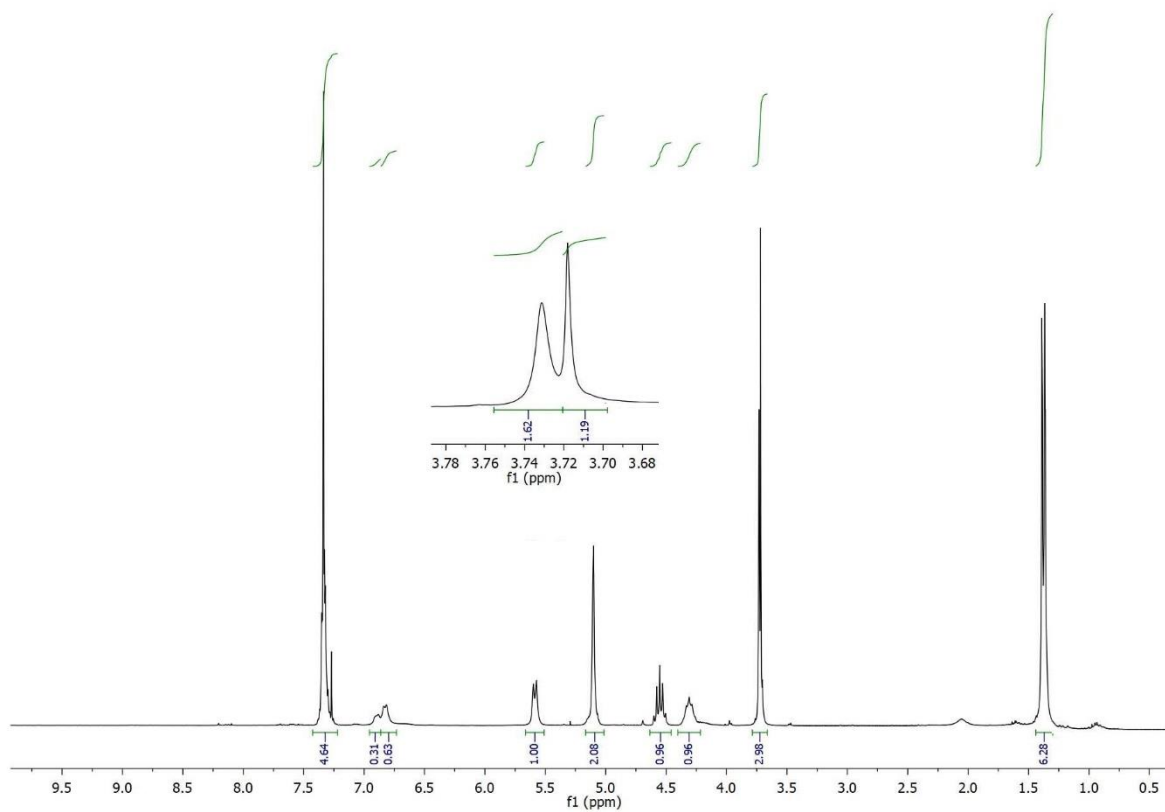

Supplement: c9ra04058g1.pdf [file c9ra04058g1.pdf]
